# Supplementary material for: Two New Phenylhydrazone Derivatives from the Pearl River Estuary Sediment-Derived Streptomyces sp. SCSIO 40020
Source: MDPI journal article supplement (doi:10.3390/md20070449), 2022-07-09

## Supplementary Materials

### Two New Phenylhydrazone Derivatives from the Pearl River Estuary sediment-derived *Streptomyces* sp. SCSIO 40020

Wei Liu<sup>1,2</sup>, Liang Ma<sup>1,3</sup>, Liping Zhang<sup>1,3</sup>, Yuchan Chen<sup>2</sup>, Qingbo Zhang<sup>1,3</sup>, Haibo Zhang<sup>1,3</sup>, Weimin Zhang<sup>2</sup>, Changsheng Zhang<sup>1,3,4\*</sup>, Wenjun Zhang<sup>1,3,4\*</sup>

- <sup>1</sup> Key Laboratory of Tropical Marine Bio-resources and Ecology, Guangdong Key Laboratory of Marine Materia Medica, South China Sea Institute of Oceanology, Innovation Academy for South China Sea Ecology and Environmental Engineering, Chinese Academy of Sciences, 164 West Xingang Road, Guangzhou 510301, China; ww11430@outlook.com (W.L.); maliangyc@hotmail.com (L.M.); zhanglp@scsio.ac.cn (L.Z.); gudaobo@163.com (Q.Z.); zhanghb@scsio.ac.cn (H.Z.)
- <sup>2</sup> State Key Laboratory of Applied Microbiology Southern China, Institute of Microbiology, Guangdong Academy of Sciences, 100 Central Xianlie Road, Guangzhou 510070, China; chenyc@gdim.cn (Y.C.); wmzhang@gdim.cn (W.Z.)
- <sup>3</sup> Southern Marine Science and Engineering Guangdong Laboratory (Guangzhou), No.1119, Haibin Road, Guangzhou 511458, China
- <sup>4</sup> University of Chinese Academy of Sciences, Beijing 100049, China
- \* Correspondence: czhang@scsio.ac.cn (C.Z.); wzhang@scsio.ac.cn (W.Z.) Tel.: +86-20-8902-3038

## Content

|                                                                                                                                 |            |
|---------------------------------------------------------------------------------------------------------------------------------|------------|
| <b>Table S1.</b> Cytotoxicities of penzonemycin A (1). .....                                                                    | <b>S3</b>  |
| <b>Table S2.</b> The antifungal activities of penzonemycin A (1).....                                                           | <b>S3</b>  |
| <b>Table S3.</b> The antibacterial activities of penzonemycin A (1). .....                                                      | <b>S3</b>  |
| <b>Table S4.</b> Crystal data and structure refinement for penzonemycin A (1).....                                              | <b>S4</b>  |
| <b>Table S5.</b> Crystal data and structure refinement for 9( <i>R</i> )-ganodermanol B (5).....                                | <b>S5</b>  |
| <b>Figure S1.</b> Natural hydrazone-containing compounds reported in literatures.....                                           | <b>S6</b>  |
| <b>Figure S2.</b> HPLC analysis of metabolite profiles of <i>Streptomyces</i> sp. SCSIO 40020 cultured in different media. .... | <b>S7</b>  |
| <b>Figure S3.</b> Spectral data for penzonemycin A (1). ....                                                                    | <b>S8</b>  |
| <b>Figure S4.</b> Spectral data for penzonemycin B (2). ....                                                                    | <b>S15</b> |
| <b>Figure S5.</b> Spectral data for demethylmycemycin A (3). ....                                                               | <b>S22</b> |
| <b>Figure S6.</b> Spectral data for mycemycin A (4). ....                                                                       | <b>S28</b> |
| <b>Figure S7.</b> Spectral data for 9( <i>R</i> )-ganodermanol B (5). ....                                                      | <b>S30</b> |
| <b>Figure S8.</b> Spectral data for isopterocarpolone (6). .....                                                                | <b>S32</b> |

**Table S1.** Cytotoxicities of penzonemycin A (**1**).

|                 | IC <sub>50</sub> (μM) |             |              |              |
|-----------------|-----------------------|-------------|--------------|--------------|
|                 | SF-268                | MCF-7       | A549         | HepG-2       |
| <b>1</b>        | 37.76 ± 1.83          | >100        | 63.19 ± 0.73 | 31.31 ± 0.87 |
| <sup>a</sup> CP | 3.26 ± 0.29           | 3.19 ± 0.12 | 1.56 ± 0.08  | 2.42 ± 0.14  |

<sup>a</sup> Cisplatin, positive control.

**Table S2.** The antifungal activities of penzonemycin A (**1**)

|                       | MIC (μg/mL)                                |                                   |                              |
|-----------------------|--------------------------------------------|-----------------------------------|------------------------------|
|                       | <i>Colletotrichum gloeosporioides</i> Penz | <i>Physalospora piricola</i> Nose | <i>Bipolaris sorokiniana</i> |
| <b>1</b>              | >64                                        | >64                               | >64                          |
| <sup>a</sup> nystatin | 2.0                                        | 0.5                               | 0.5                          |

<sup>a</sup> nystatin, positive control.

**Table S3.** The antibacterial activities of penzonemycin A (**1**).

|                | MIC (μg/mL)                        |                                           |                                         |                  |
|----------------|------------------------------------|-------------------------------------------|-----------------------------------------|------------------|
|                | <i>Escherichia coli</i> ATCC 25922 | <i>Acinetobacter baumannii</i> ATCC 19606 | <i>Staphylococcus aureus</i> ATCC 29213 | MRSA ATCC 43300  |
| <b>1</b>       | >64                                | >64                                       | >64                                     | >64              |
| <b>Control</b> | 1.0 <sup>a</sup>                   | 1.0 <sup>a</sup>                          | 0.5 <sup>b</sup>                        | 0.5 <sup>b</sup> |

a. ciprofloxacin, b. vancomycin

**Table S4.** Crystal data and structure refinement for penzonemycin A (**1**).

|                                             |                                                                |
|---------------------------------------------|----------------------------------------------------------------|
| Identification code                         | penzonemycin A ( <b>1</b> )                                    |
| Empirical formula                           | C <sub>13</sub> H <sub>15</sub> N <sub>3</sub> O <sub>5</sub>  |
| Formula weight                              | 293.28                                                         |
| Temperature/K                               | 103(5)                                                         |
| Crystal system                              | monoclinic                                                     |
| Space group                                 | P2 <sub>1</sub> /n                                             |
| a/Å                                         | 4.8385(2)                                                      |
| b/Å                                         | 19.6128(7)                                                     |
| c/Å                                         | 14.5170(6)                                                     |
| $\alpha$ /°                                 | 90                                                             |
| $\beta$ /°                                  | 98.487(4)                                                      |
| $\gamma$ /°                                 | 90                                                             |
| Volume/Å <sup>3</sup>                       | 1362.53(9)                                                     |
| Z                                           | 4                                                              |
| $\rho_{\text{calc}}$ /cm <sup>3</sup>       | 1.430                                                          |
| $\mu$ /mm <sup>-1</sup>                     | 0.945                                                          |
| F(000)                                      | 616.0                                                          |
| Crystal size/mm <sup>3</sup>                | 0.1 × 0.02 × 0.02                                              |
| Radiation                                   | Cu K $\alpha$ ( $\lambda$ = 1.54184)                           |
| 2 $\theta$ range for data collection/°      | 9.018 to 148.158                                               |
| Index ranges                                | -5 ≤ h ≤ 3, -24 ≤ k ≤ 23, -16 ≤ l ≤ 18                         |
| Reflections collected                       | 6318                                                           |
| Independent reflections                     | 2631 [ $R_{\text{int}}$ = 0.0376, $R_{\text{sigma}}$ = 0.0368] |
| Data/restraints/parameters                  | 2631/0/202                                                     |
| Goodness-of-fit on F <sup>2</sup>           | 1.075                                                          |
| Final R indexes [ $I \geq 2\sigma(I)$ ]     | $R_1$ = 0.0576, $wR_2$ = 0.1756                                |
| Final R indexes [all data]                  | $R_1$ = 0.0649, $wR_2$ = 0.1809                                |
| Largest diff. peak/hole / e Å <sup>-3</sup> | 0.34/-0.34                                                     |

**Table S5.** Crystal data and structure refinement for 9(*R*)-ganodermanol B (**5**)

|                                               |                                                                              |
|-----------------------------------------------|------------------------------------------------------------------------------|
| Identification code                           | 9( <i>R</i> )-ganodermanol B ( <b>5</b> )                                    |
| Empirical formula                             | C <sub>15</sub> H <sub>26</sub> O <sub>2</sub>                               |
| Formula weight                                | 238.36                                                                       |
| Temperature/K                                 | 99.8(8)                                                                      |
| Crystal system                                | orthorhombic                                                                 |
| Space group                                   | P2 <sub>1</sub> 2 <sub>1</sub> 2 <sub>1</sub>                                |
| a/Å                                           | 8.35172(11)                                                                  |
| b/Å                                           | 11.17809(15)                                                                 |
| c/Å                                           | 14.82535(19)                                                                 |
| α/°                                           | 90                                                                           |
| β/°                                           | 90                                                                           |
| γ/°                                           | 90                                                                           |
| Volume/Å <sup>3</sup>                         | 1384.04(3)                                                                   |
| Z                                             | 4                                                                            |
| ρ <sub>calc</sub> /g/cm <sup>3</sup>          | 1.144                                                                        |
| μ/mm <sup>-1</sup>                            | 0.570                                                                        |
| F(000)                                        | 528.0                                                                        |
| Crystal size/mm <sup>3</sup>                  | 0.1 × 0.05 × 0.05                                                            |
| Radiation                                     | CuKα (λ = 1.54184)                                                           |
| 2θ range for data collection/°                | 9.91 to 148.416                                                              |
| Index ranges                                  | -8 ≤ h ≤ 10, -13 ≤ k ≤ 6, -17 ≤ l ≤ 17                                       |
| Reflections collected                         | 7345                                                                         |
| Independent reflections                       | 2727 [ <i>R</i> <sub>int</sub> = 0.0278, <i>R</i> <sub>sigma</sub> = 0.0319] |
| Data/restraints/parameters                    | 2727/0/159                                                                   |
| Goodness-of-fit on F <sup>2</sup>             | 1.056                                                                        |
| Final R indexes [ <i>I</i> ≥ 2σ ( <i>I</i> )] | <i>R</i> <sub>1</sub> = 0.0355, w <i>R</i> <sub>2</sub> = 0.0934             |
| Final R indexes [all data]                    | <i>R</i> <sub>1</sub> = 0.0369, w <i>R</i> <sub>2</sub> = 0.0946             |
| Largest diff. peak/hole / e Å <sup>-3</sup>   | 0.23/-0.18                                                                   |
| Flack parameter                               | 0.04(9)                                                                      |

**Figure S1.** Natural hydrazone-containing compounds reported in literatures.

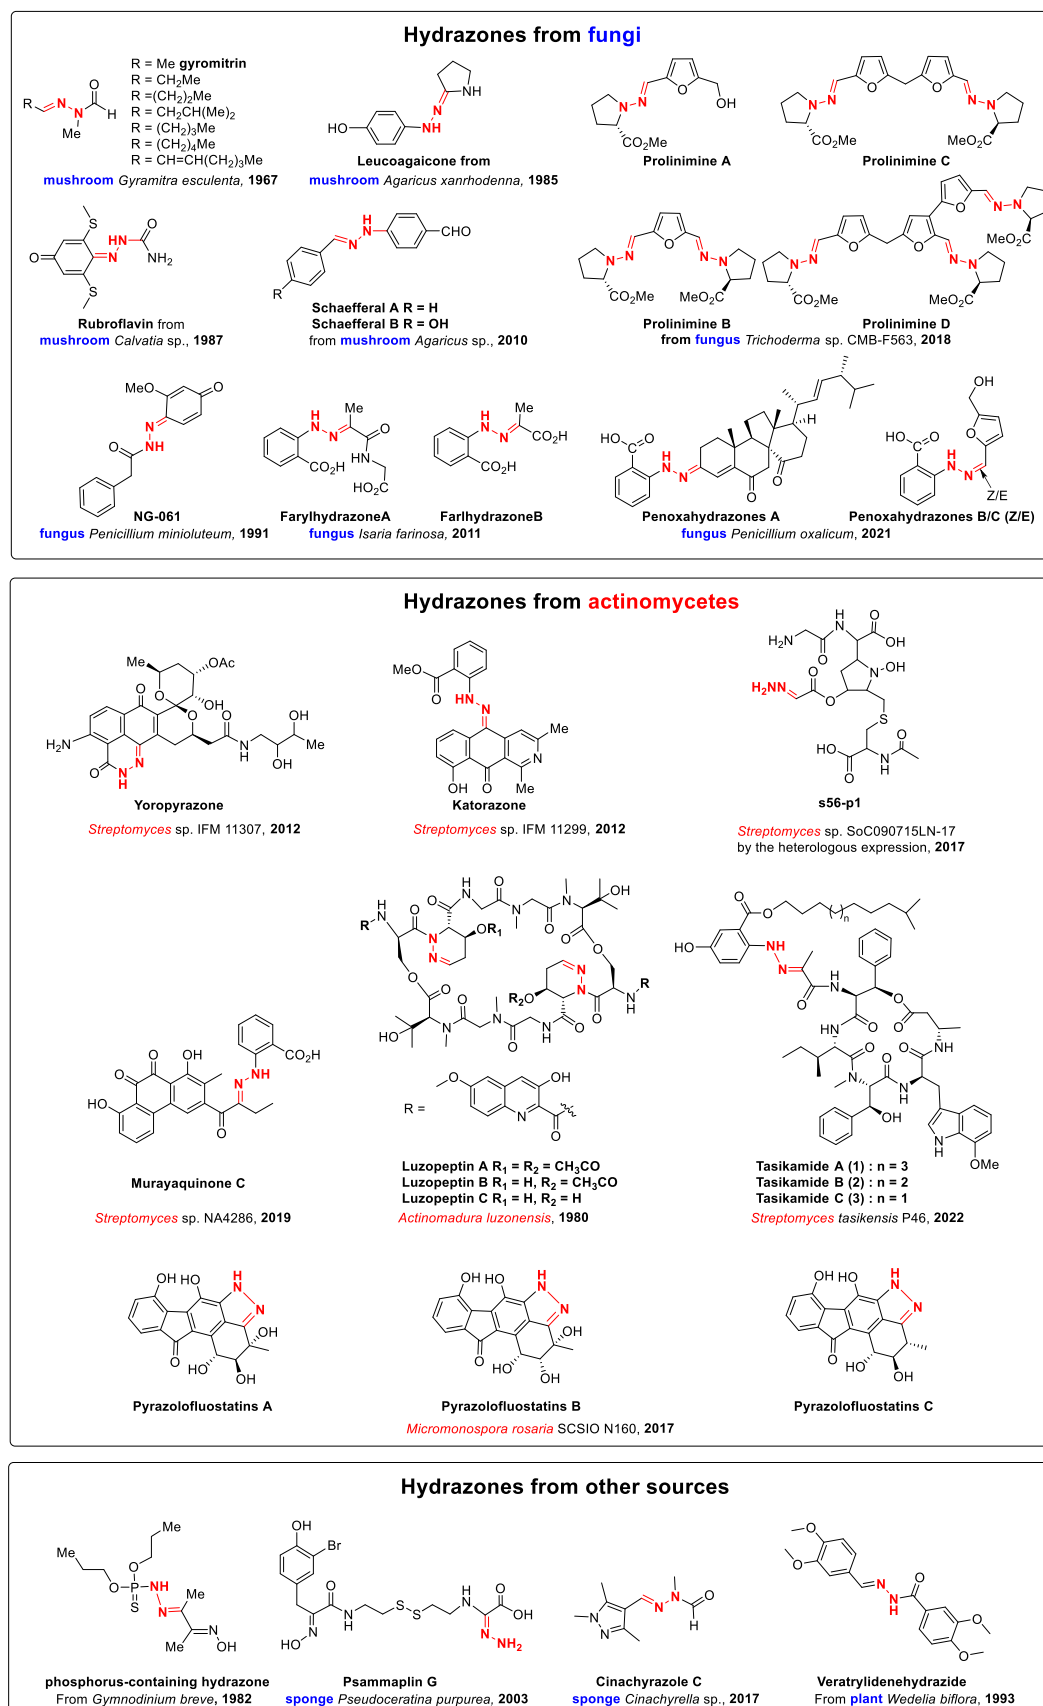

**Figure S2.** HPLC analysis of metabolite profiles of *Streptomyces* sp. SCSIO 40020 cultured in different media.

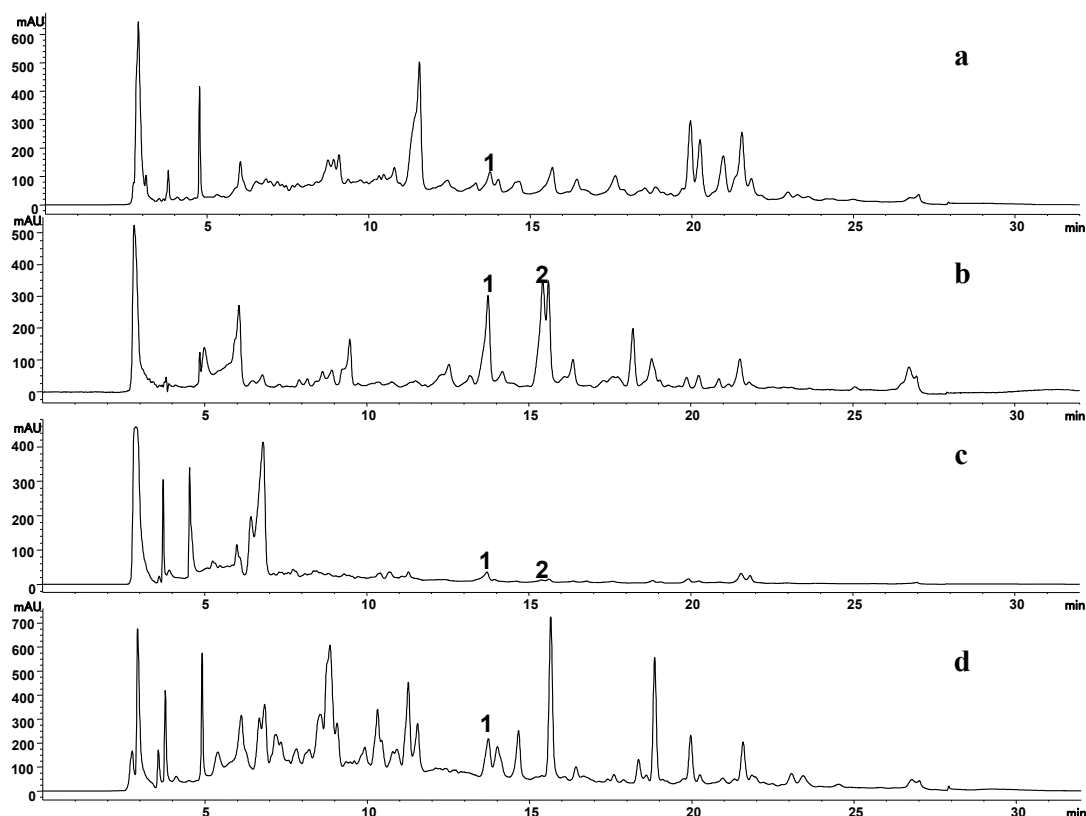

(a) modified-A1BFe+C (soluble starch 1.0%, yeast extract 0.4%, tryptone 0.2%,  $\text{CaCO}_3$  0.2%, sea salts 3%, pH 7.2–7.4); (b) Modified-ISP3 (oatmeal 1.5%,  $\text{FeSO}_4$  0.0001%,  $\text{MnCl}_2$  0.0001%,  $\text{ZnSO}_4$  0.0001%, sea salts 3%, pH 7.2–7.4). (c) ZM7 medium (glycerol 0.5%, arginine 0.1%, glucose 0.1%,  $\text{K}_2\text{HPO}_4$  0.03%,  $\text{MgSO}_4 \cdot 7\text{H}_2\text{O}$  0.02%,  $\text{NaCl}$  0.03%, vitamin B complex 0.5ml, pH 7.2–7.4); (d) AM6-4 (glycerol 0.1%, bacterial peptone 0.5%, glycine 0.01%, alanine 0.01%,  $\text{CaCO}_3$  0.5%, sea salts 3.0%, pH 7.2–7.4).

**Figure S3.** Spectral data for penzonemycin A (**1**).

**(A)** HRESIMS

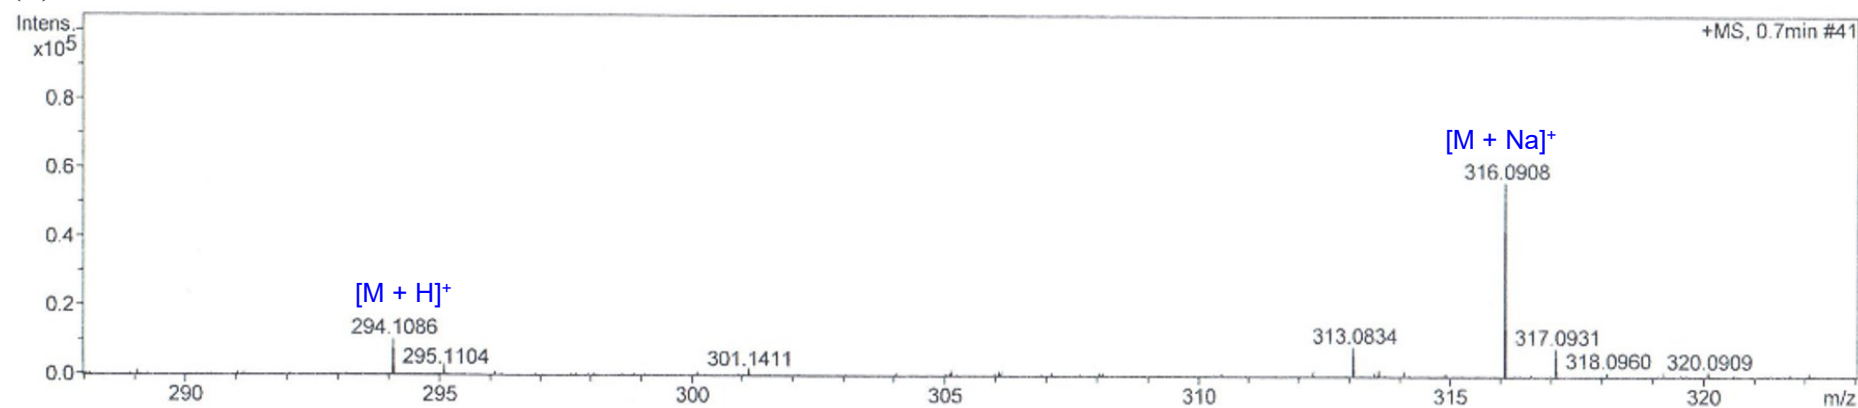

**(B)** IR

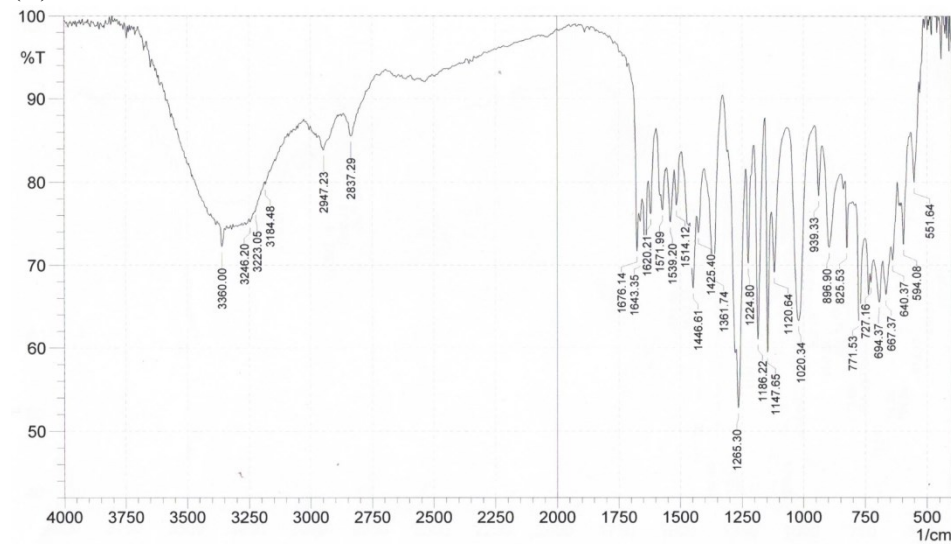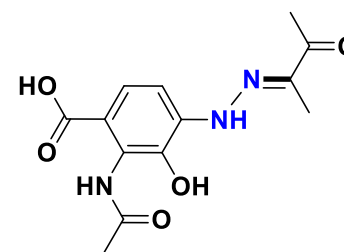

**1**

Chemical Formula:  $C_{13}H_{15}N_3O_5$   
calculated for  $[M + H]^+$ : 294.1084  
calculated for  $[M + Na]^+$ : 316.0904



**Figure S3.** Spectral data for penzonemycin A (**1**) (continued).

(C) The  $^1\text{H}$  NMR spectrum of penzonemycin A (**1**) in  $\text{DMSO}-d_6$ .

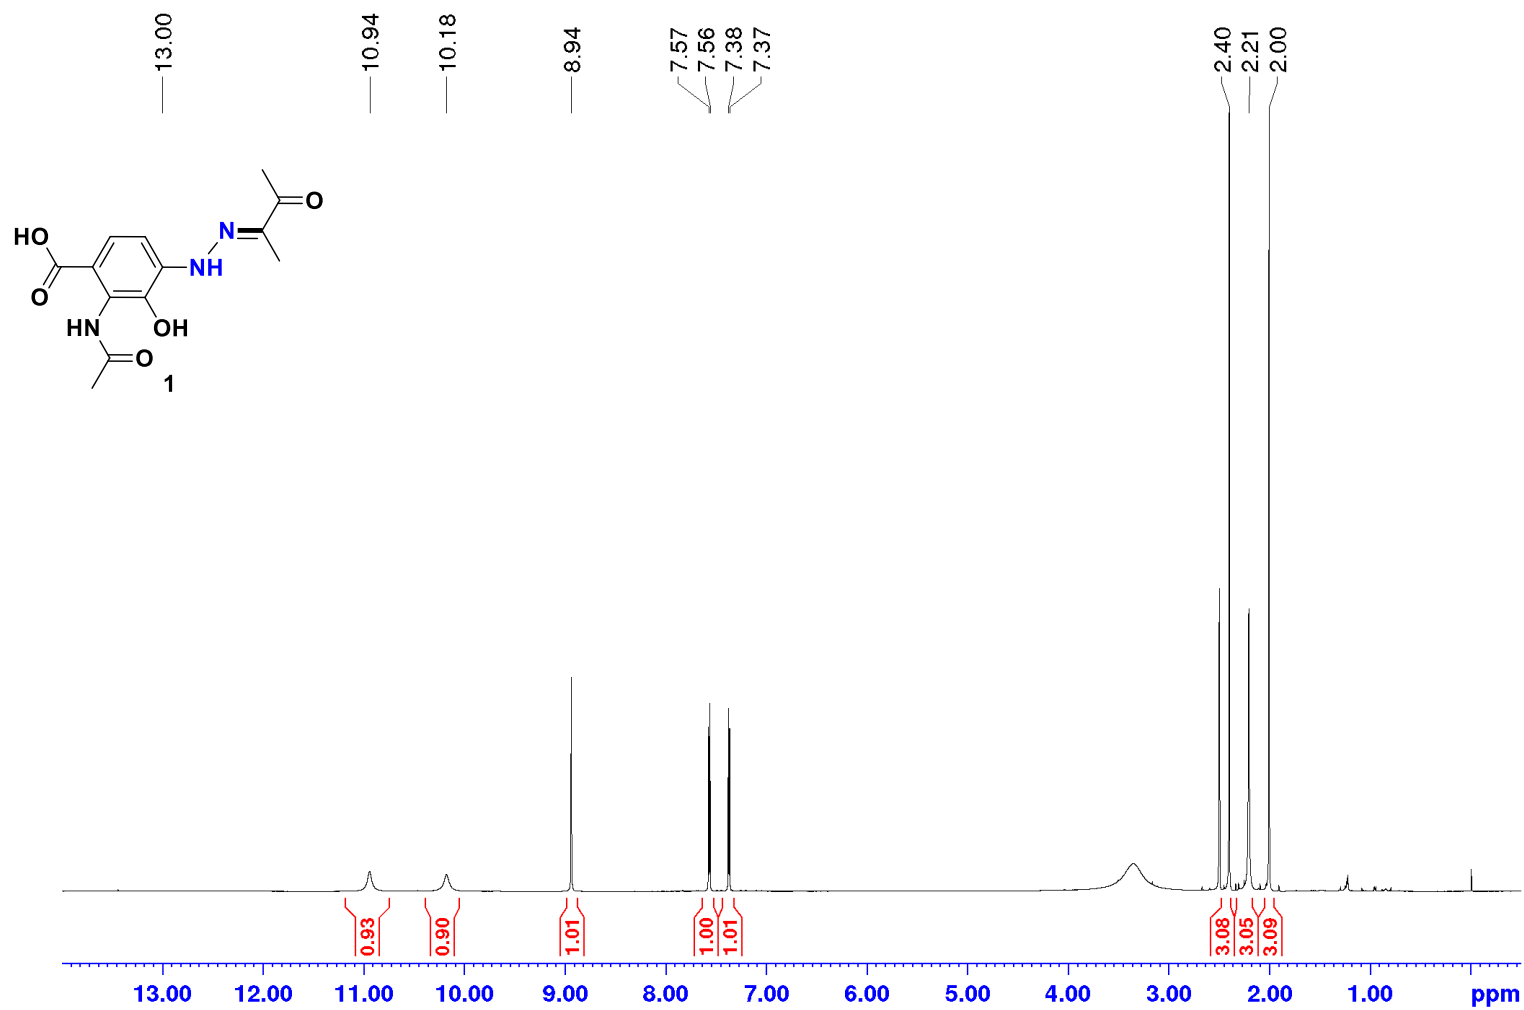

**Figure S3.** Spectral data for penzonemycin A (**1**) (continued).

**(D)** The  $^{13}\text{C}$  NMR spectrum of penzonemycin A (**1**) in  $\text{DMSO}-d_6$ .

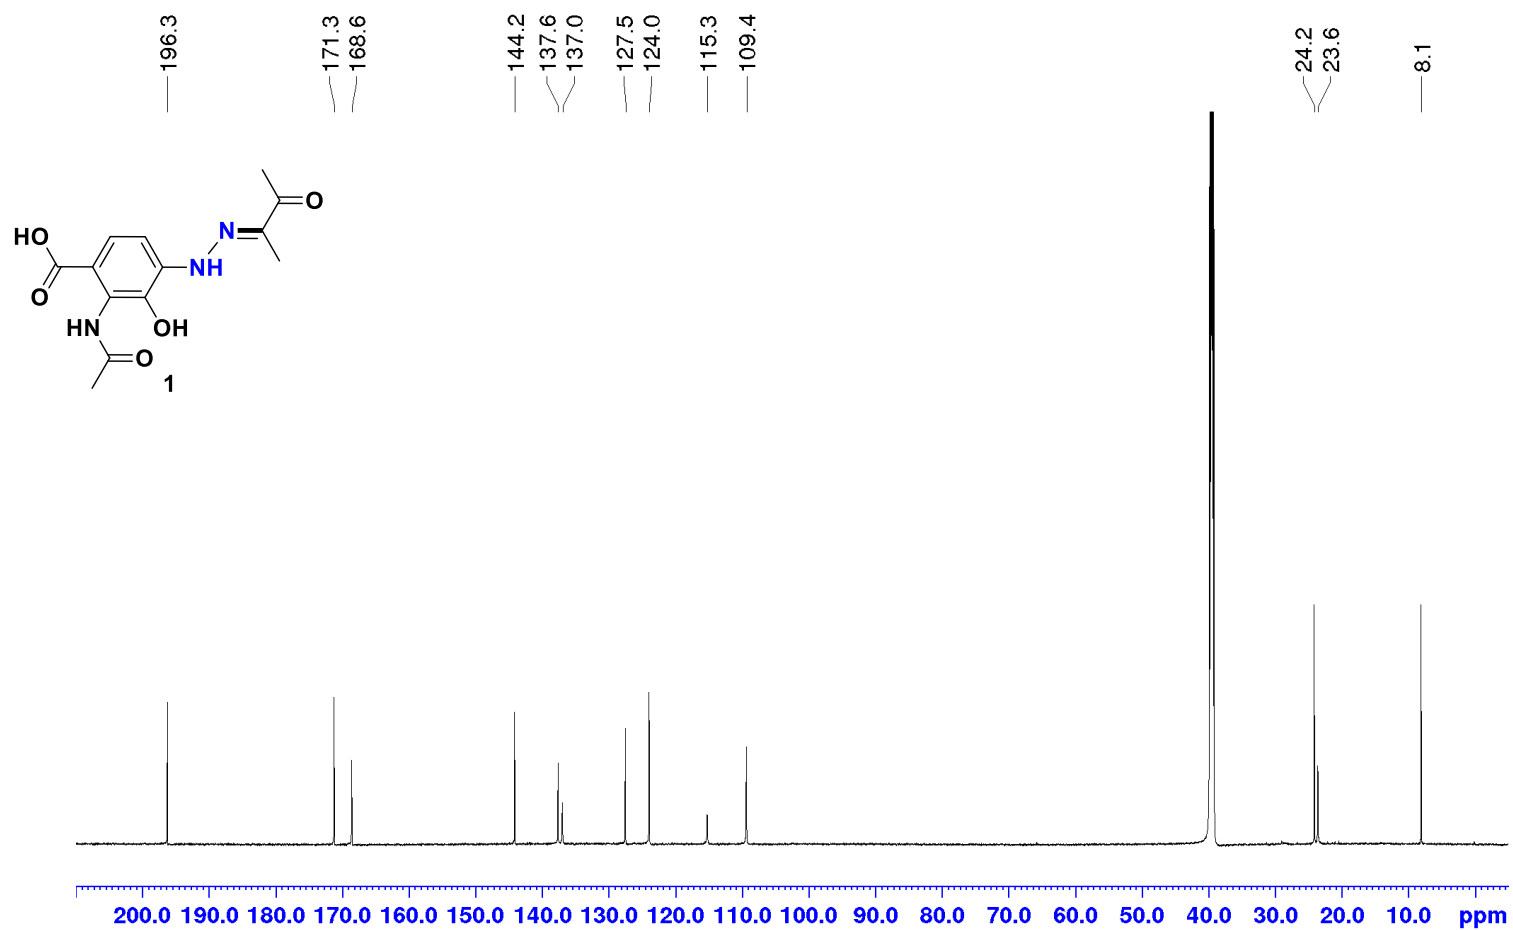

**Figure S3.** Spectral data for penzonemycin A (**1**) (continued).

**(E)** The HSQC spectrum of penzonemycin A (**1**) in DMSO-*d*<sub>6</sub>.

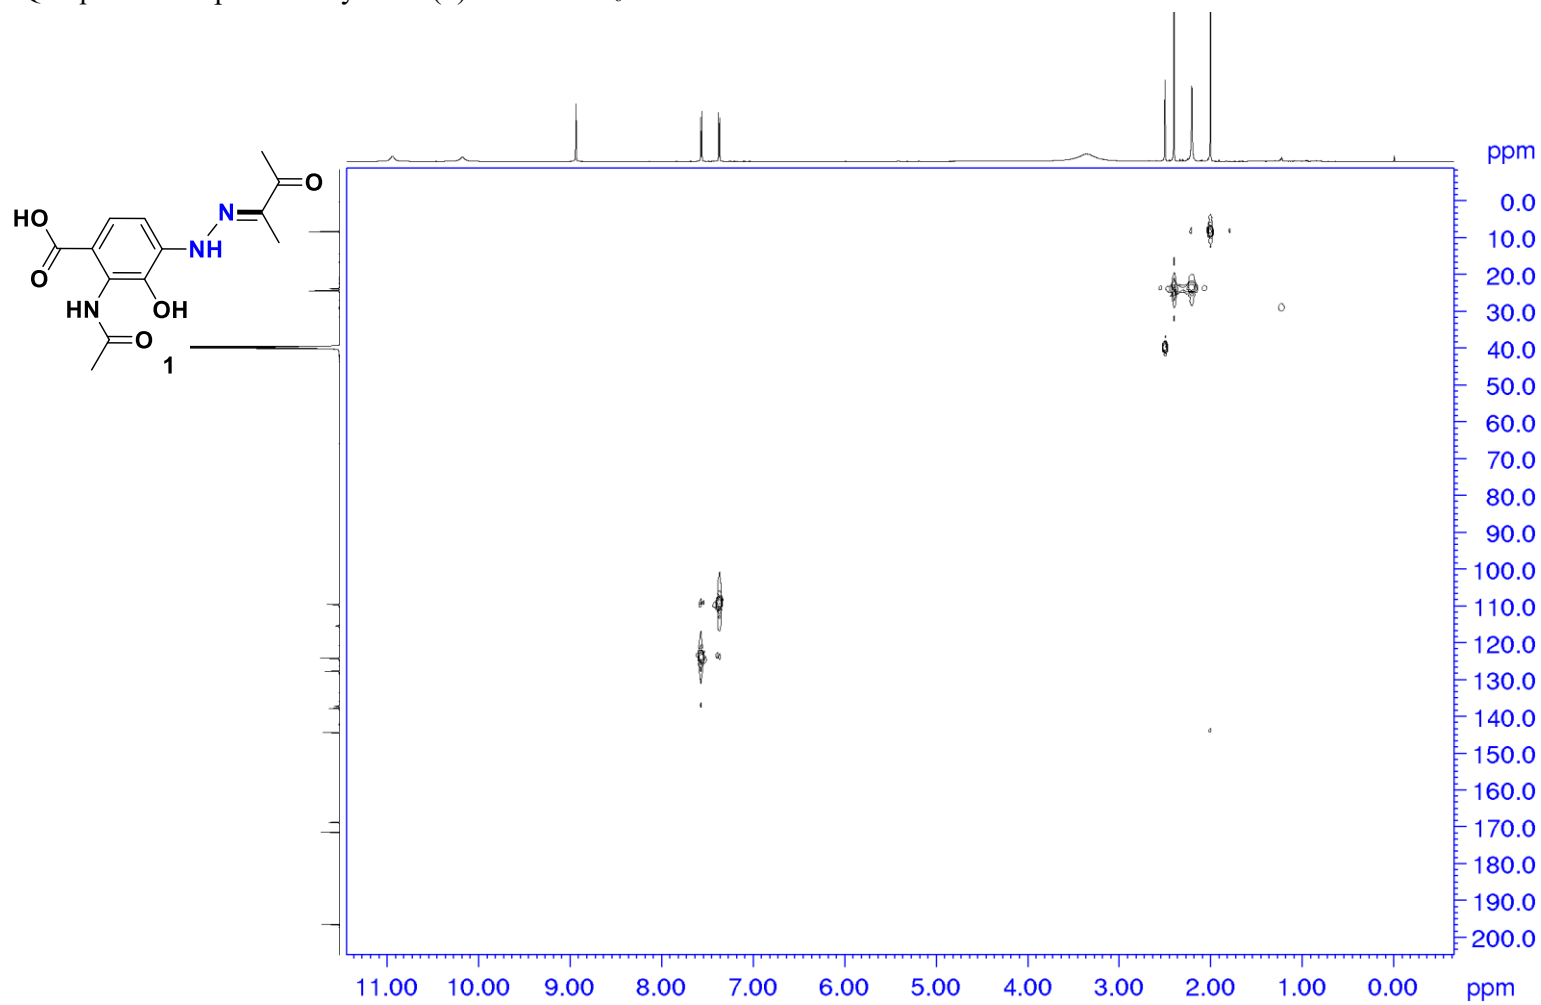

**Figure S3.** Spectral data for penzonemycin A (**1**) (continued).

**(F)** The HMBC spectrum of penzonemycin A (**1**) in DMSO-*d*<sub>6</sub>.

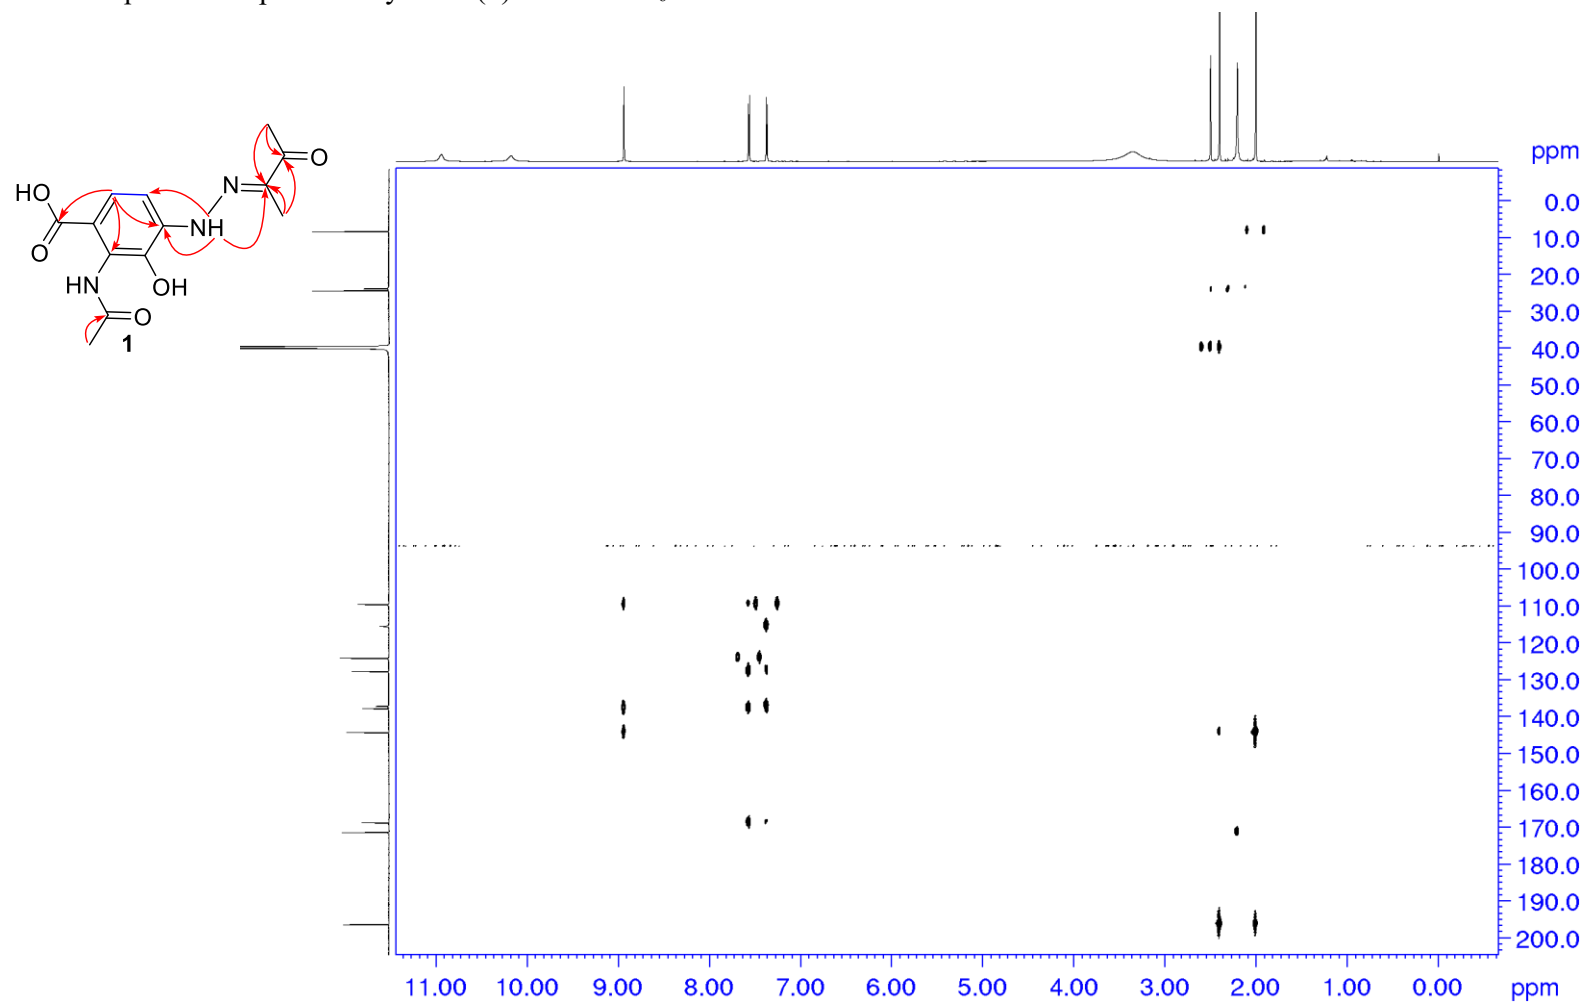

**Figure S3.** Spectral data for penzonemycin A (**1**) (continued).

**(G)** The  $^1\text{H}$ - $^1\text{H}$  COSY spectrum of penzonemycin A (**1**) in  $\text{DMSO-}d_6$ .

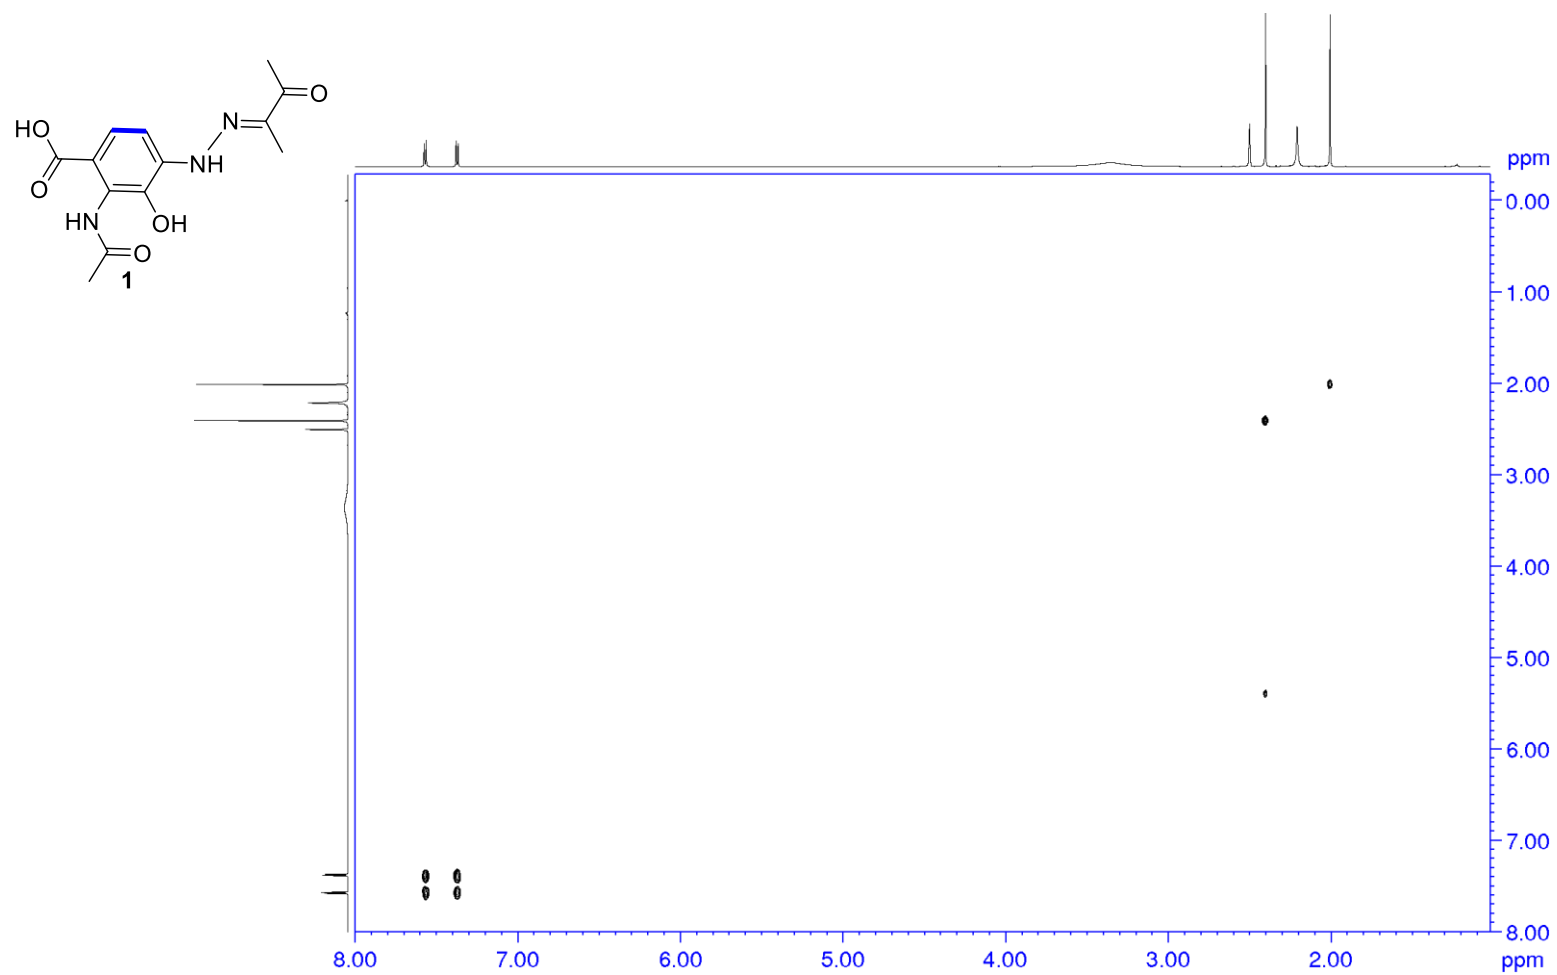

**Figure S3.** Spectral data for penzonemycin A (**1**) (continued).  
**(H)** The NOESY spectrum of penzonemycin A (**1**) in DMSO-*d*<sub>6</sub>.

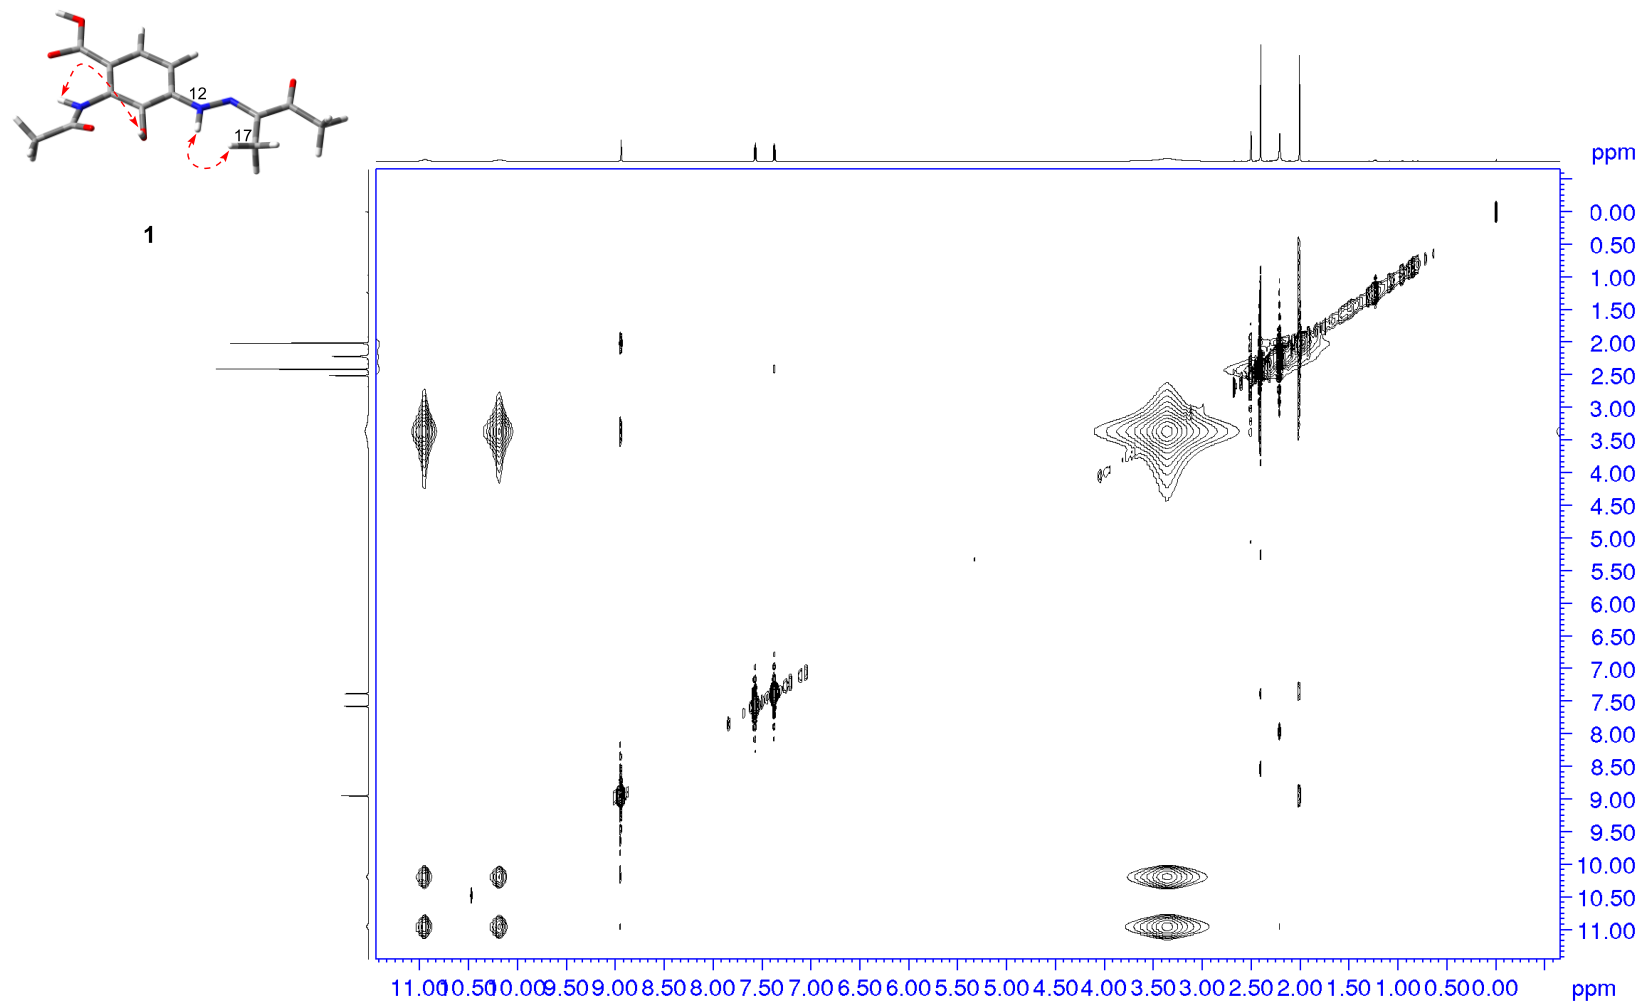

**Figure S4.** Spectral data for penzonemycin B (**2**).

(A) HR-ESI-MS

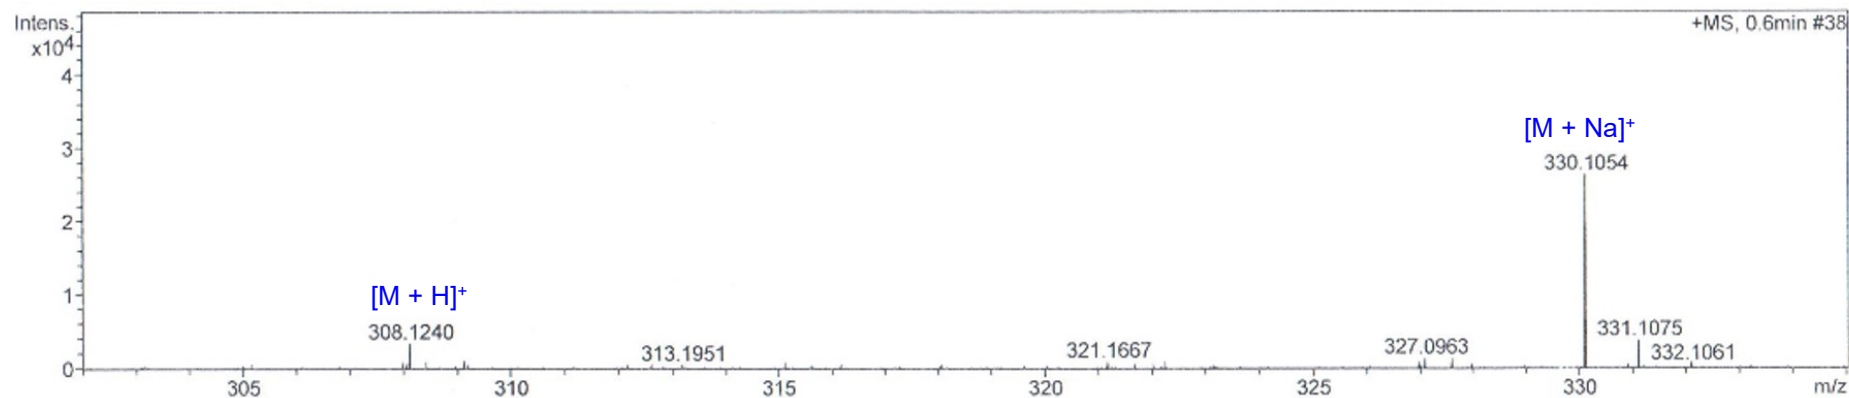

(B) IR

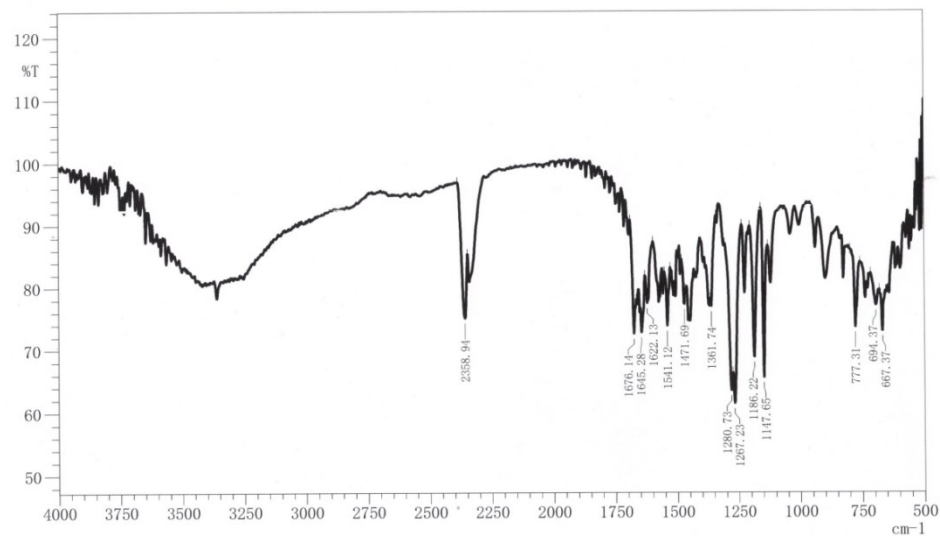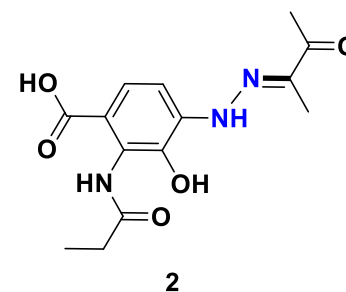

Chemical Formula: C<sub>14</sub>H<sub>17</sub>N<sub>3</sub>O<sub>5</sub>  
calculated for [M + H]<sup>+</sup>: 308.1241  
calculated for [M + Na]<sup>+</sup>: 330.1060

**Figure S4.** Spectral data for penzonemycin B (**2**) (continued).

**(C)** The  $^1\text{H}$  NMR spectrum of penzonemycin B (**2**) in  $\text{DMSO}-d_6$ .

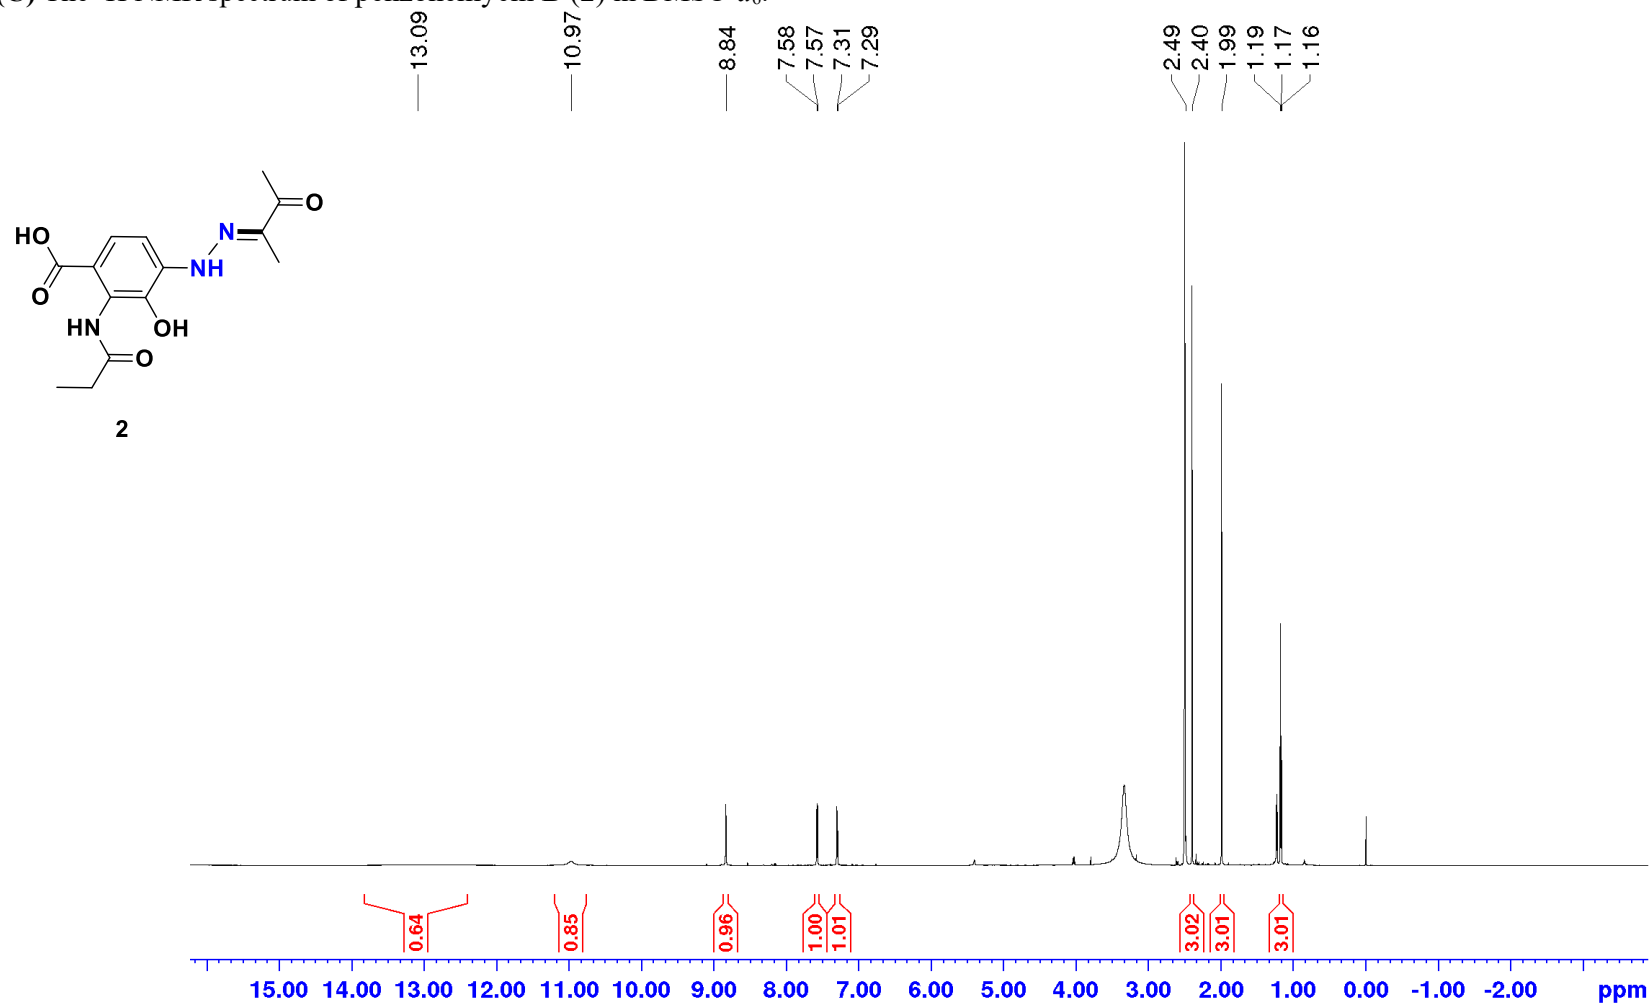



**Figure S4.** Spectral data for penzonemycin B (**2**) (continued).

**(D)** The  $^{13}\text{C}$  NMR spectra of penzonemycin B (**2**) in  $\text{DMSO}-d_6$ .

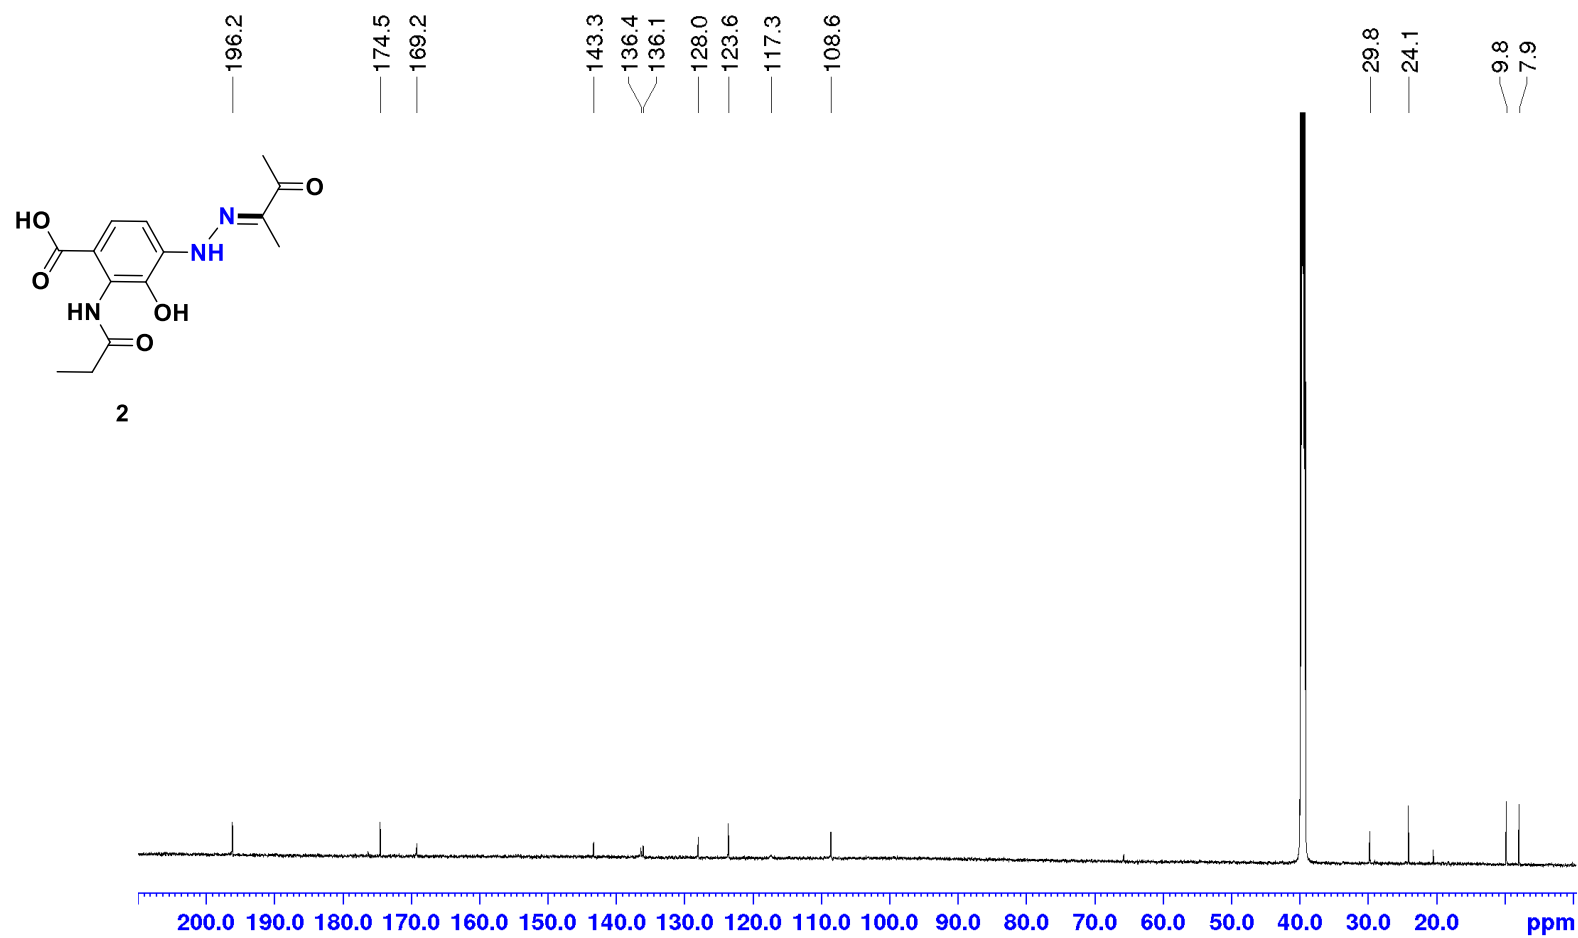

**Figure S4.** Spectral data for penzonemycin B (**2**) (continued).

**(E)** The HSQC spectrum of penzonemycin B (**2**) in DMSO-*d*<sub>6</sub>.

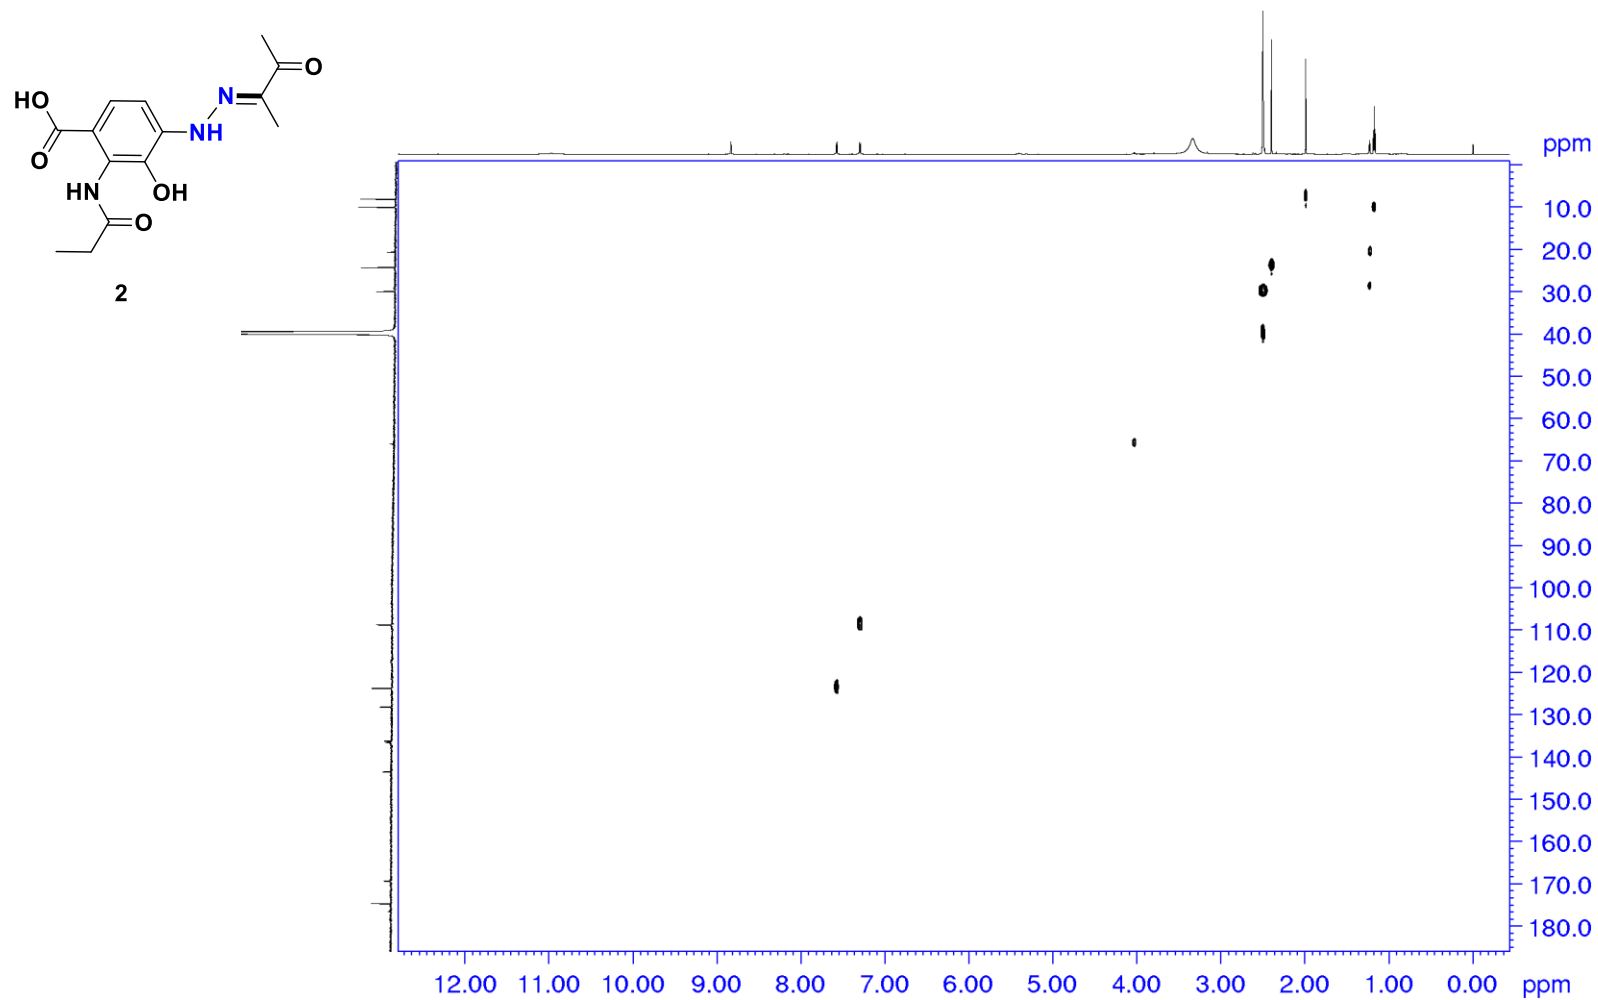

**Figure S4.** Spectral data for penzonemycin B (**2**) (continued).

**(F)** The HMBC spectrum of penzonemycin B (**2**) in DMSO- $d_6$ .

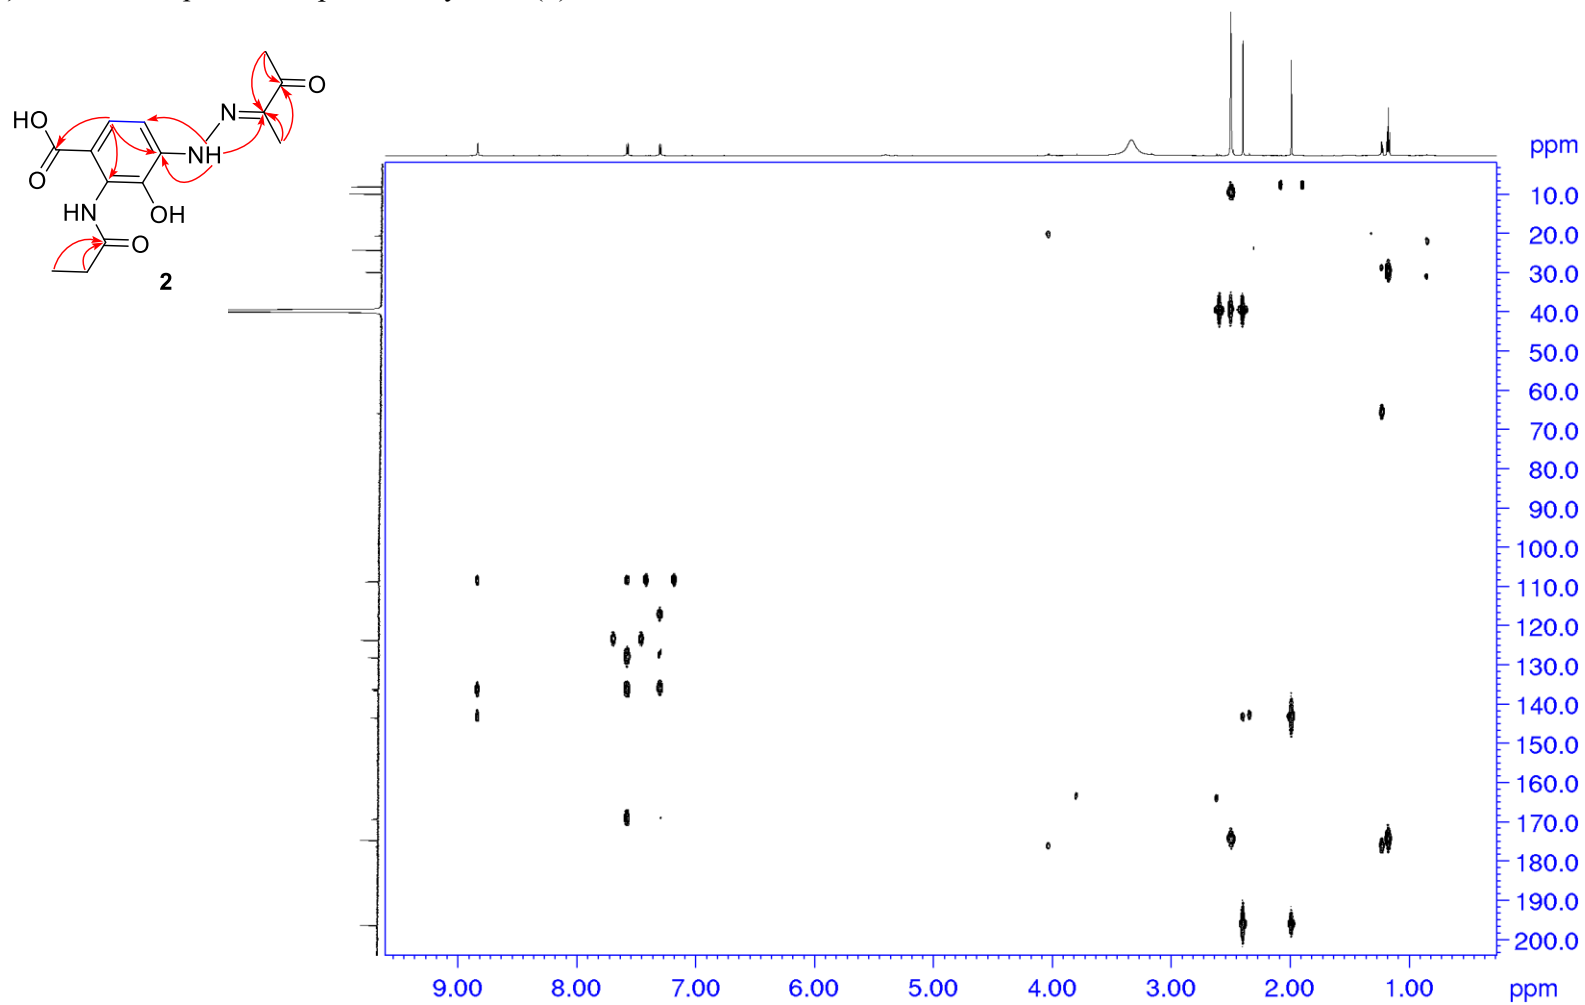

**Figure S4.** Spectral data for penzonemycin B (**2**) (continued).

**(G)** The  $^1\text{H}$ - $^1\text{H}$  COSY spectrum of penzonemycin B (**2**) in  $\text{DMSO-}d_6$ .

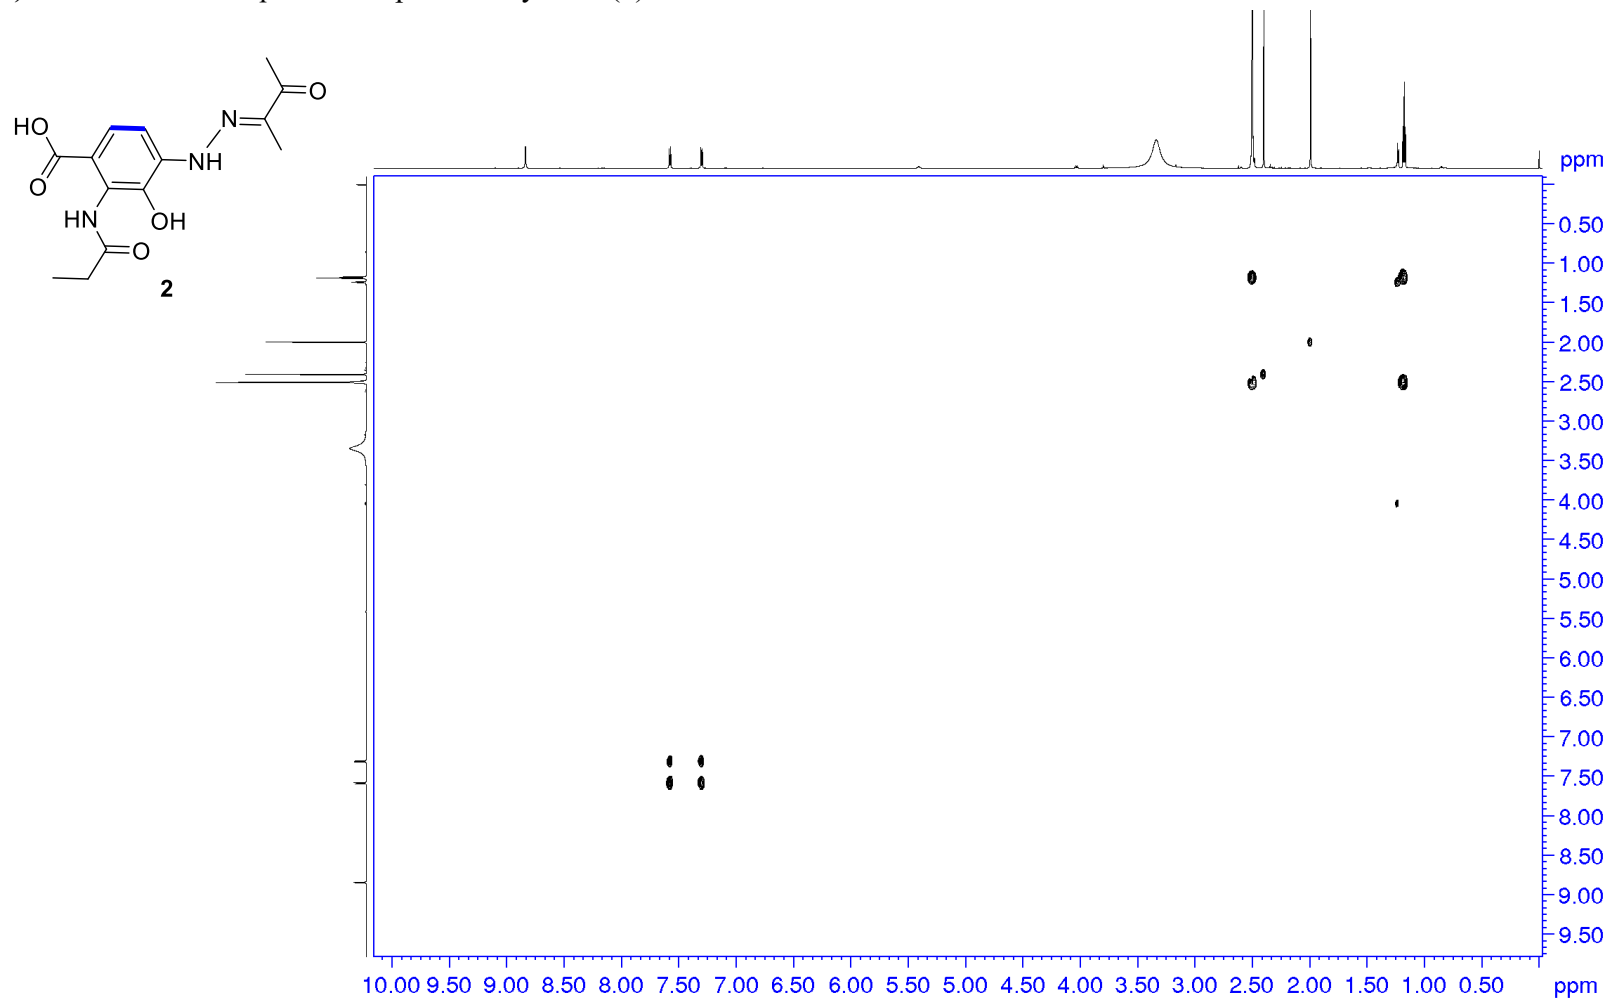

**Figure S4.** Spectral data for penzonemycin B (**2**) (continued).

**(H)** The NOESY spectrum of penzonemycin B (**2**) in DMSO-*d*<sub>6</sub>.

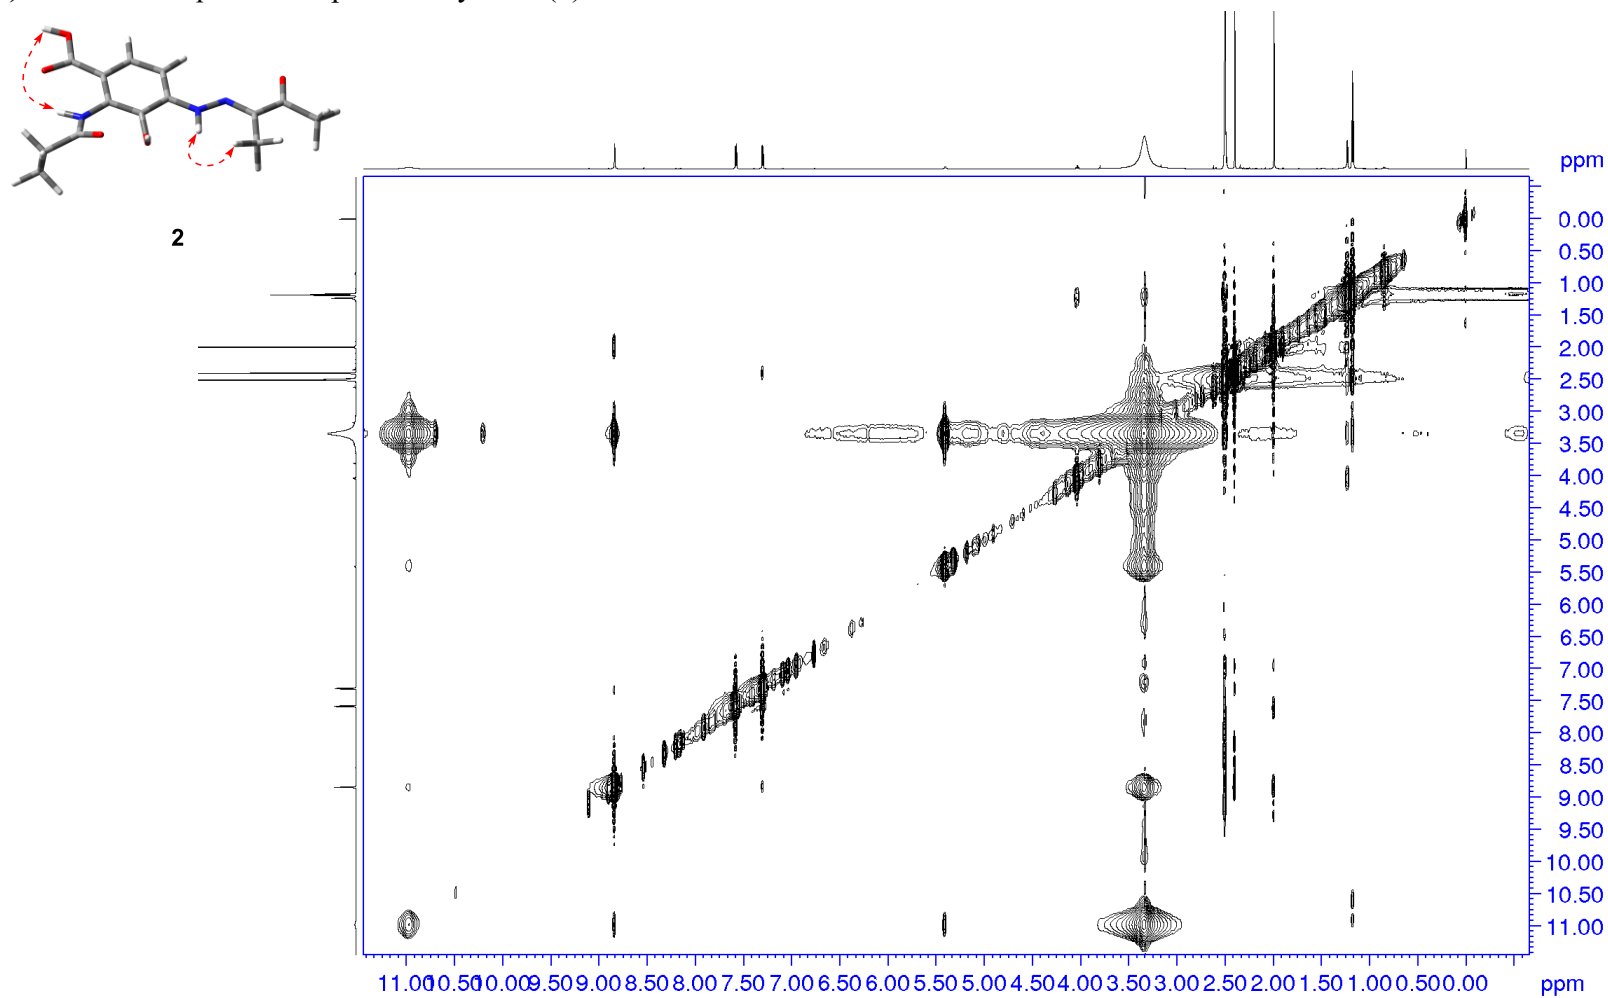

**Figure S5.** Spectral data for demethylmycemycin A (**3**).

(A) HRESIMS

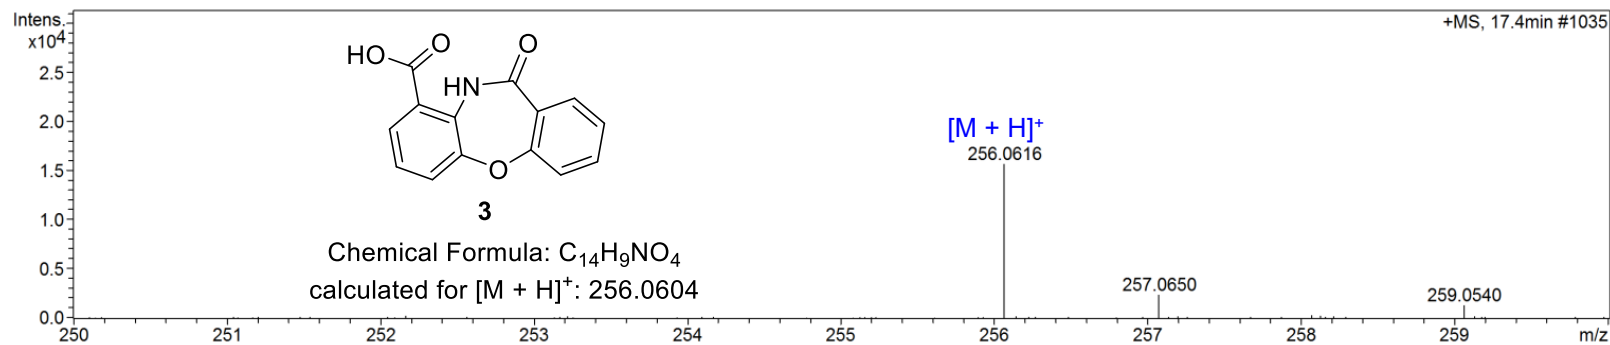

(B)

(B) UV

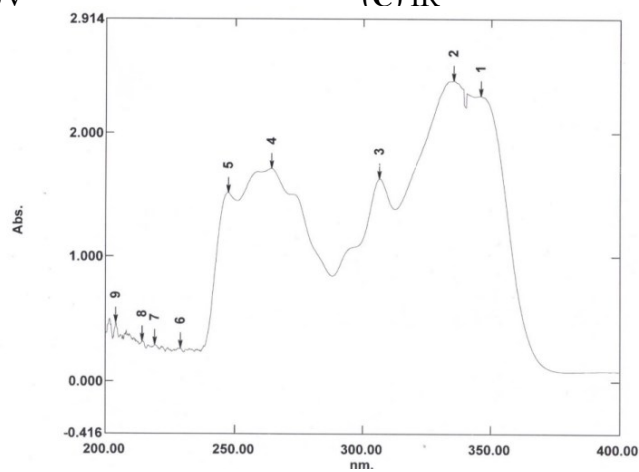

(C) IR

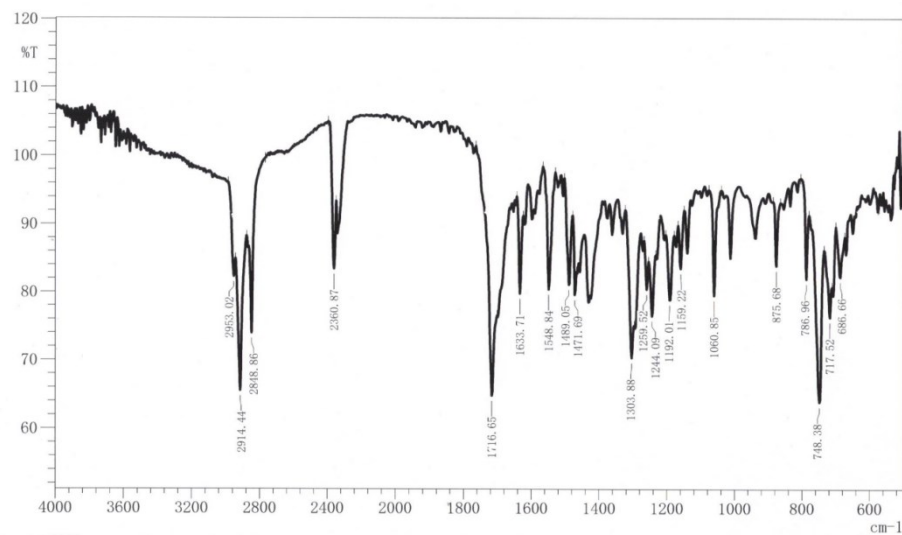

**Figure S5.** Spectral data for demethylmycemycin A (**3**) (continued).

**(D)** The  $^1\text{H}$  NMR spectrum of demethylmycemycin A (**3**) in  $\text{DMSO}-d_6$ .

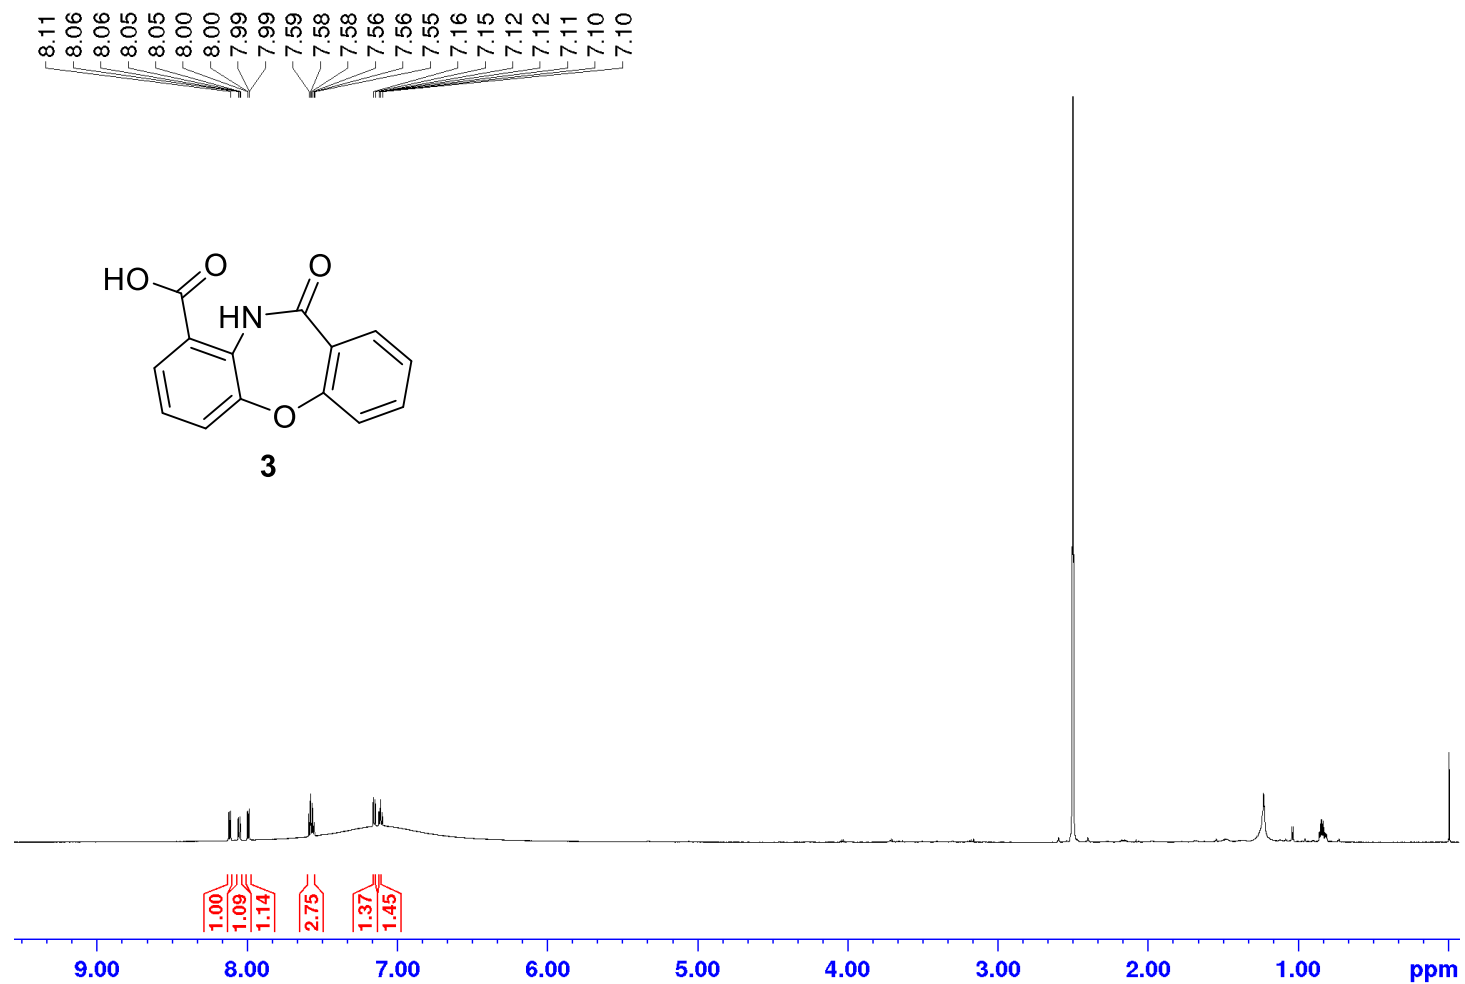

**Figure S5.** Spectral data for demethylmycemycin A (**3**) (continued).

(E) The  $^{13}\text{C}$  NMR and DEPT135 spectra of demethylmycemycin A (**3**) in  $\text{DMSO-}d_6$ .

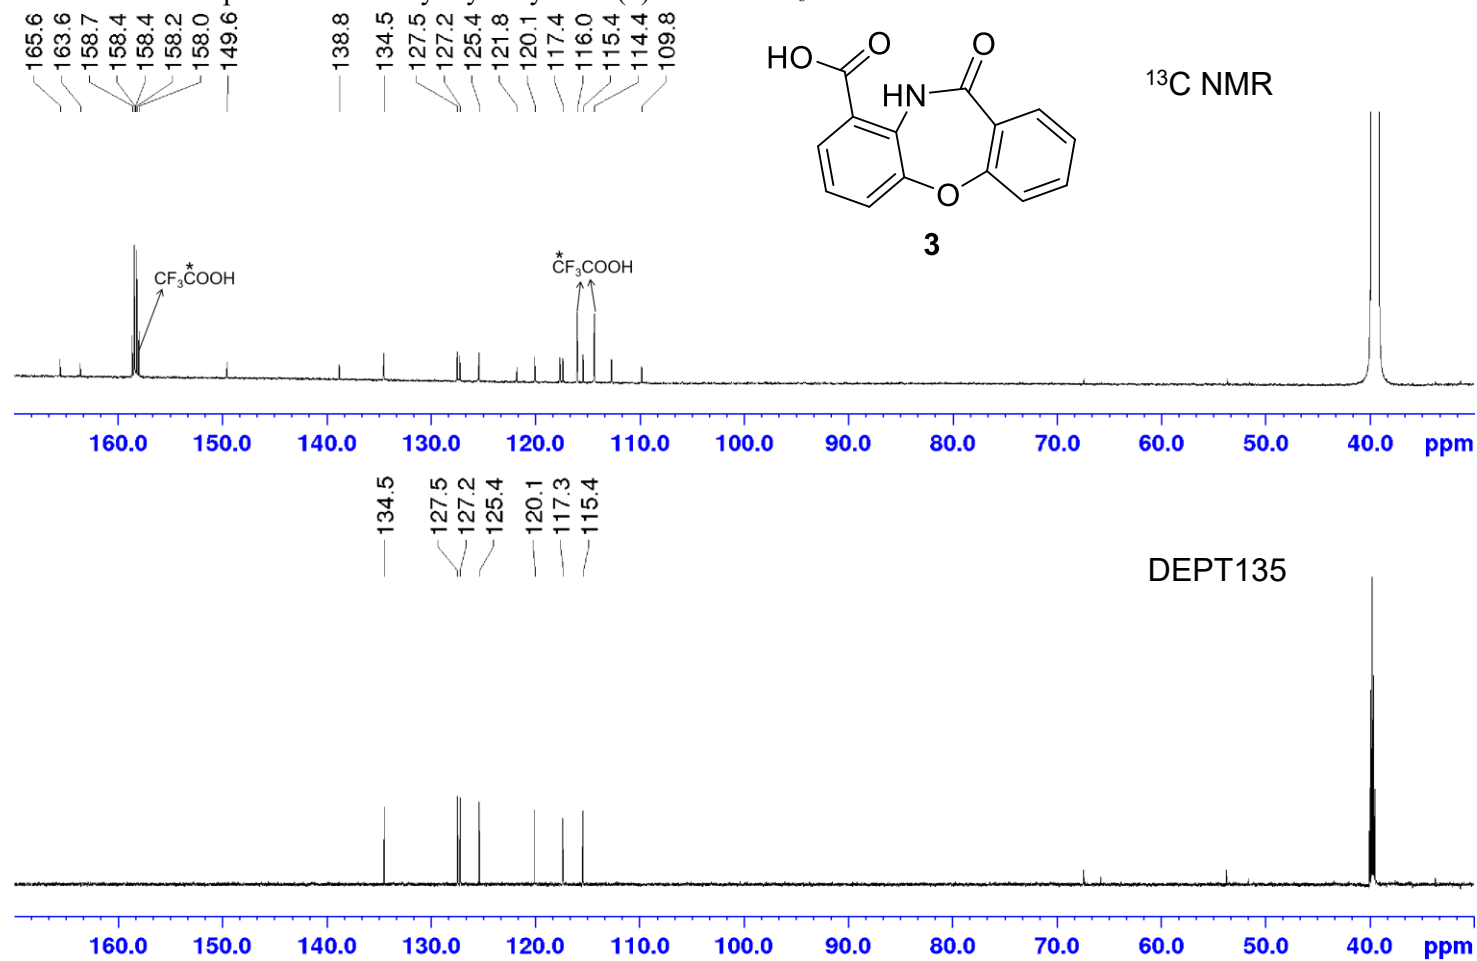



**Figure S5.** Spectral data for demethylmycemycin A (**3**) (continued).

**(F)** The HSQC spectrum of demethylmycemycin A (**3**) in DMSO-*d*<sub>6</sub>.

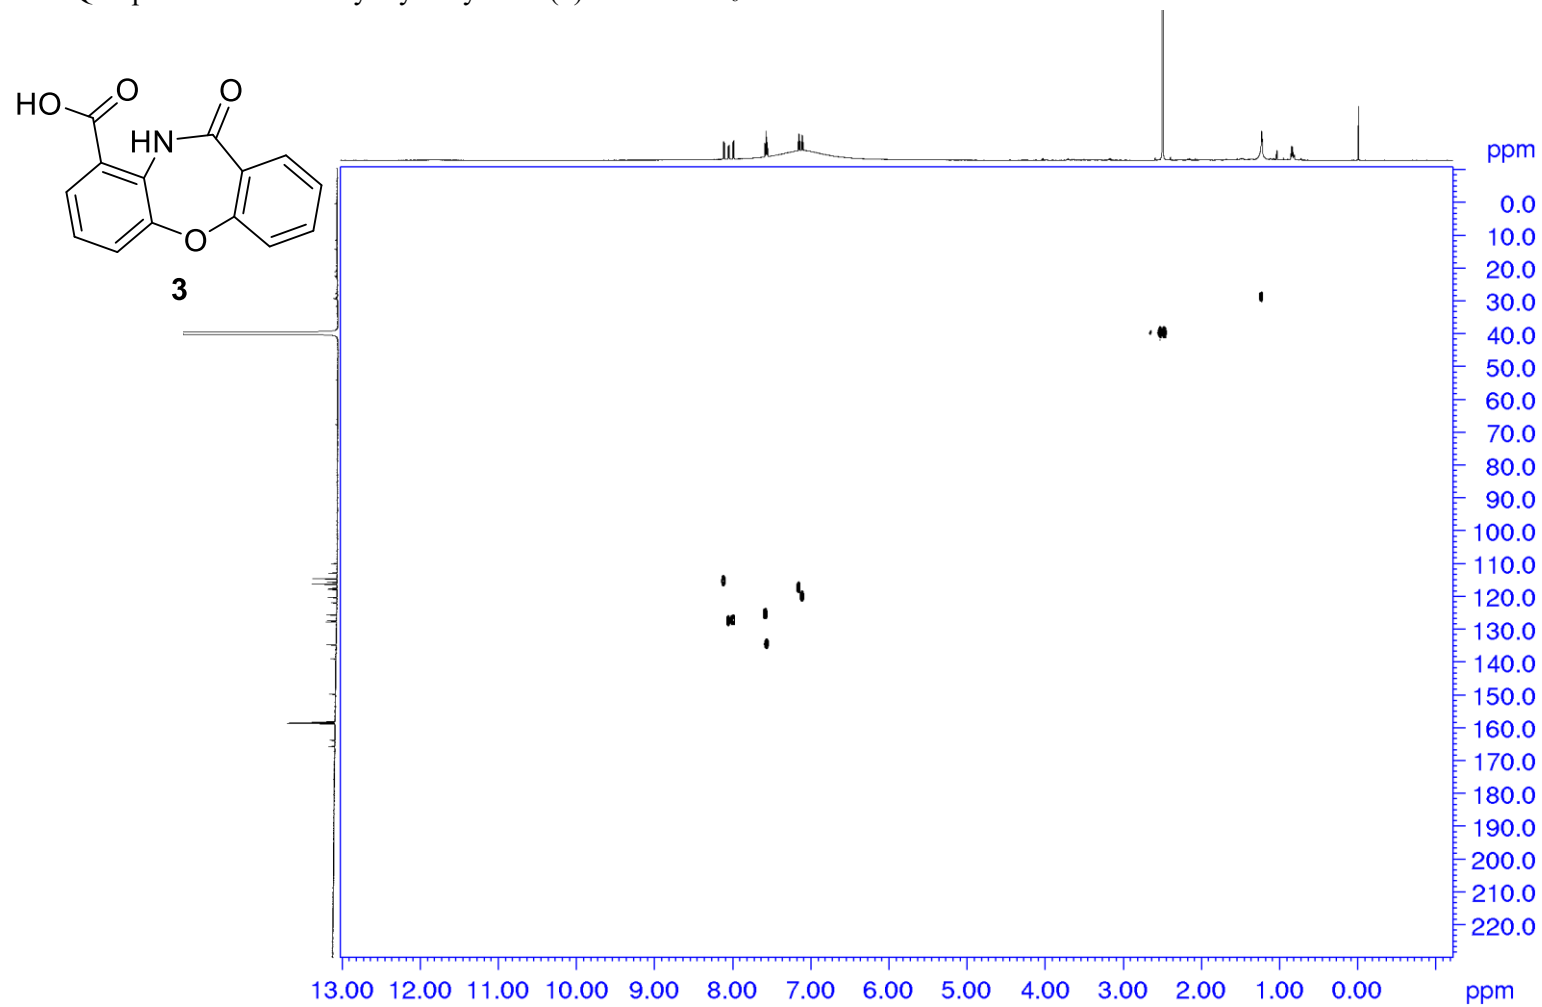

**Figure S5.** Spectral data for demethylmycemycin A (**3**) (continued).

**(G)** The HMBC spectrum of demethylmycemycin A (**3**) in DMSO- $d_6$ .

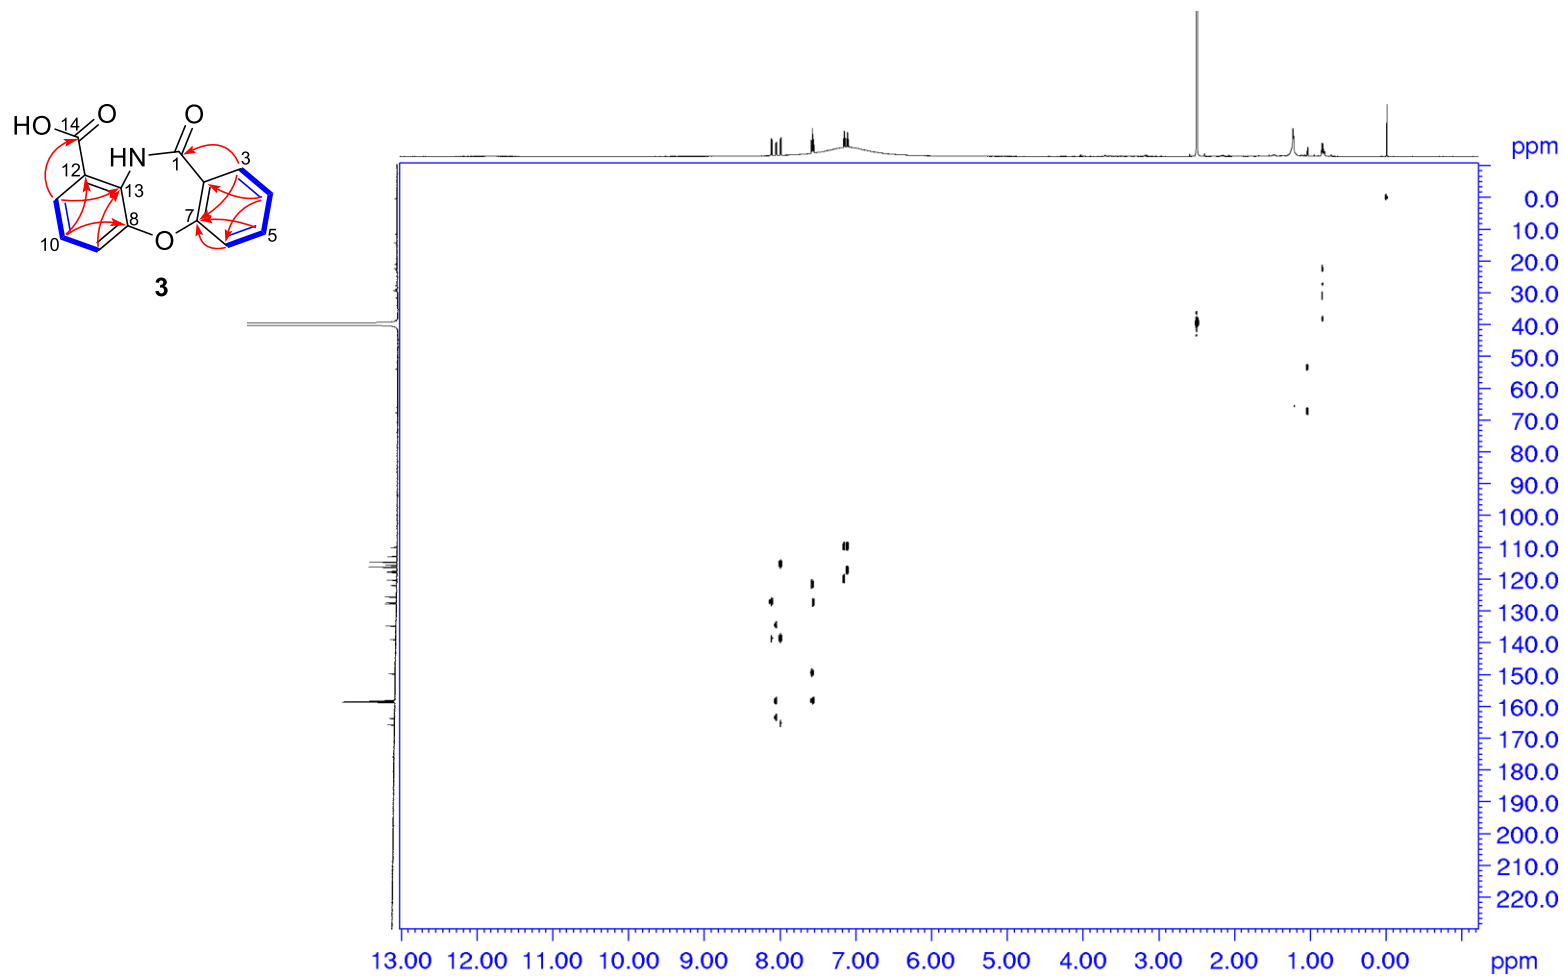

**Figure S5.** Spectral data for demethylmycemycin A (**3**) (continued).  
**(H)** The  $^1\text{H}$ - $^1\text{H}$  COSY spectrum of demethylmycemycin A (**3**) in  $\text{DMSO}-d_6$ .

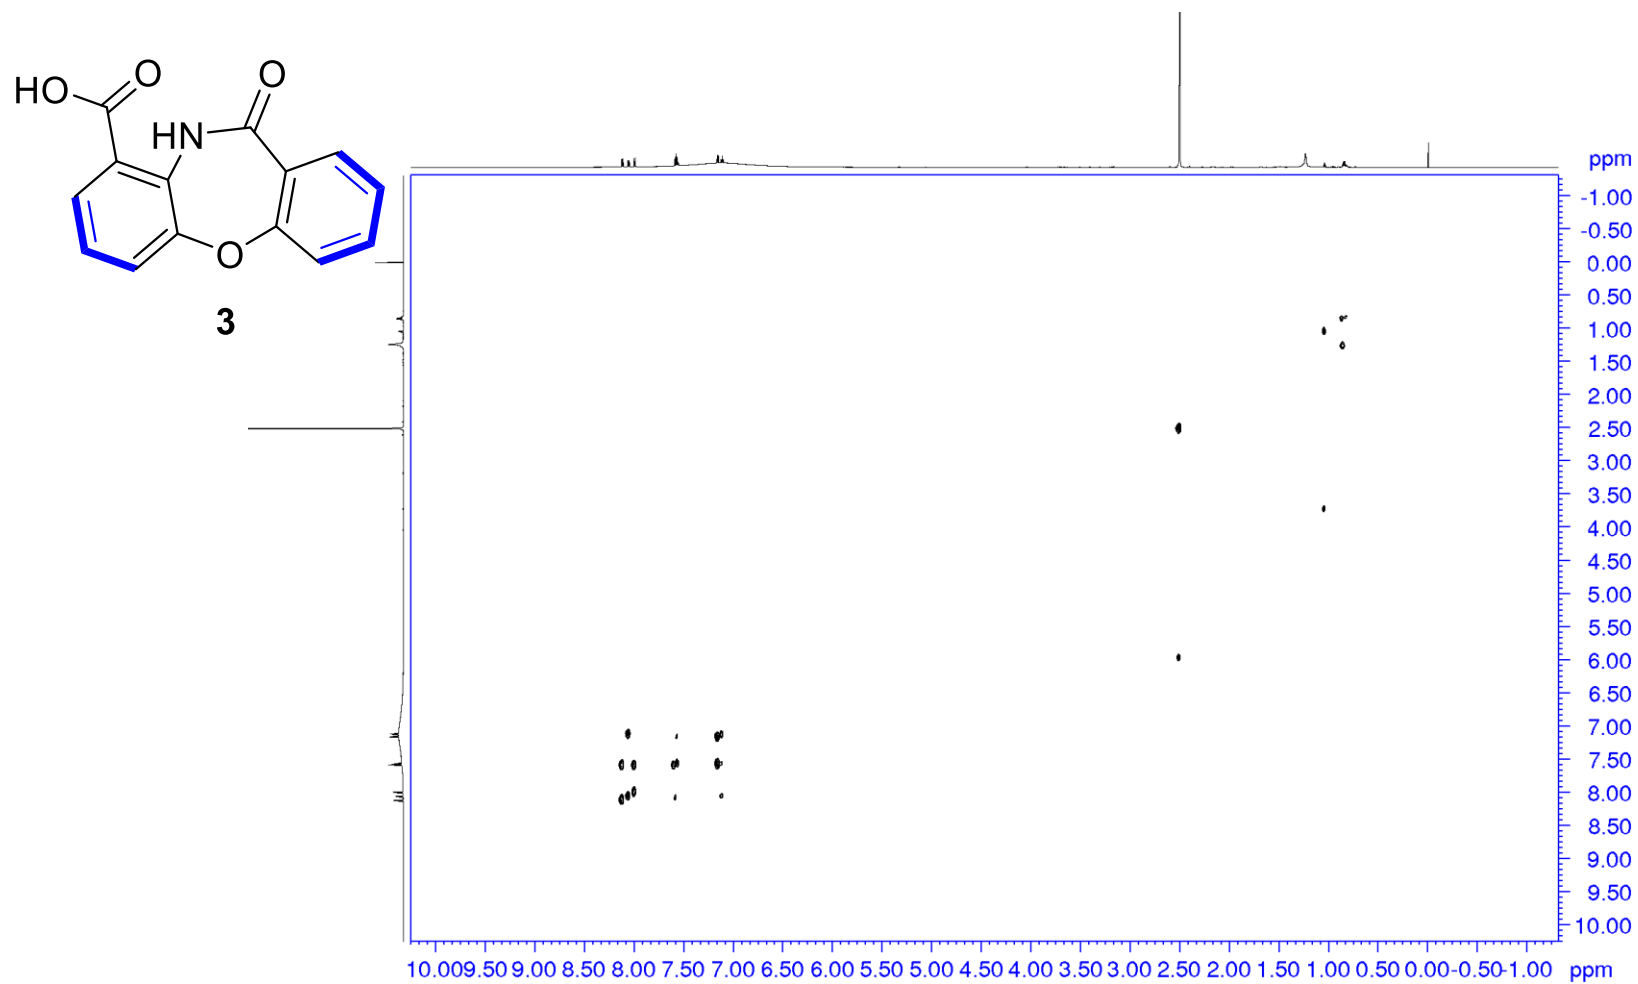

**Figure S6.** Spectral data for mycemycin A (**4**).

**(A)** The  $^1\text{H}$  NMR spectrum of mycemycin A (**4**) in  $\text{CDCl}_3$ .

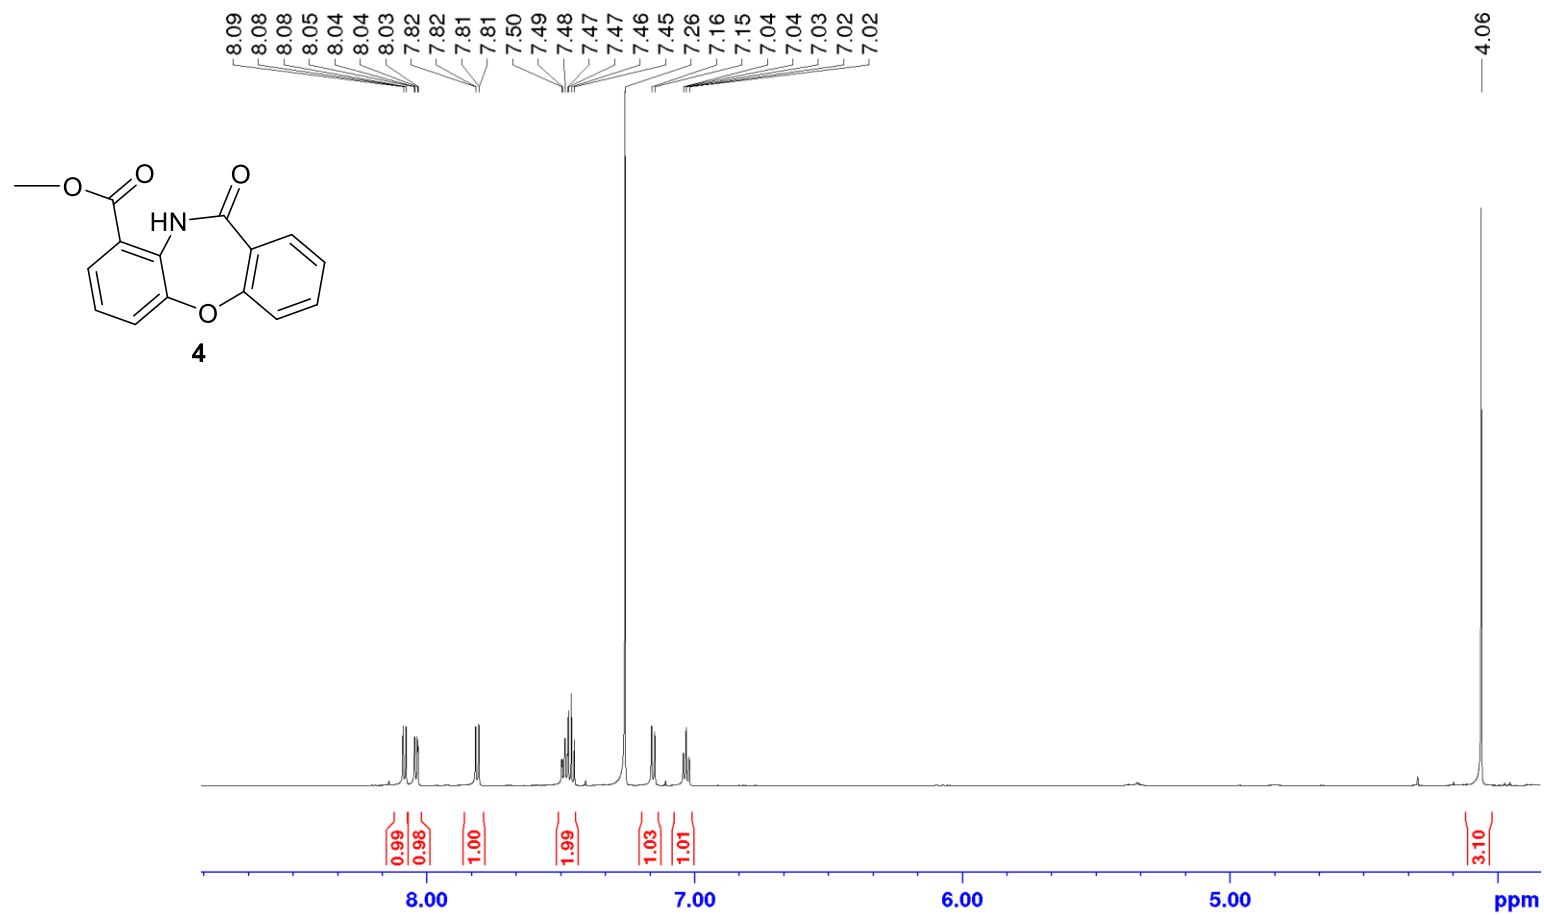

**Figure S6.** Spectral data for mycemycin A (**4**) (continued).

**(B)** The  $^{13}\text{C}$  NMR spectrum of mycemycin A (**4**) in  $\text{CDCl}_3$ .

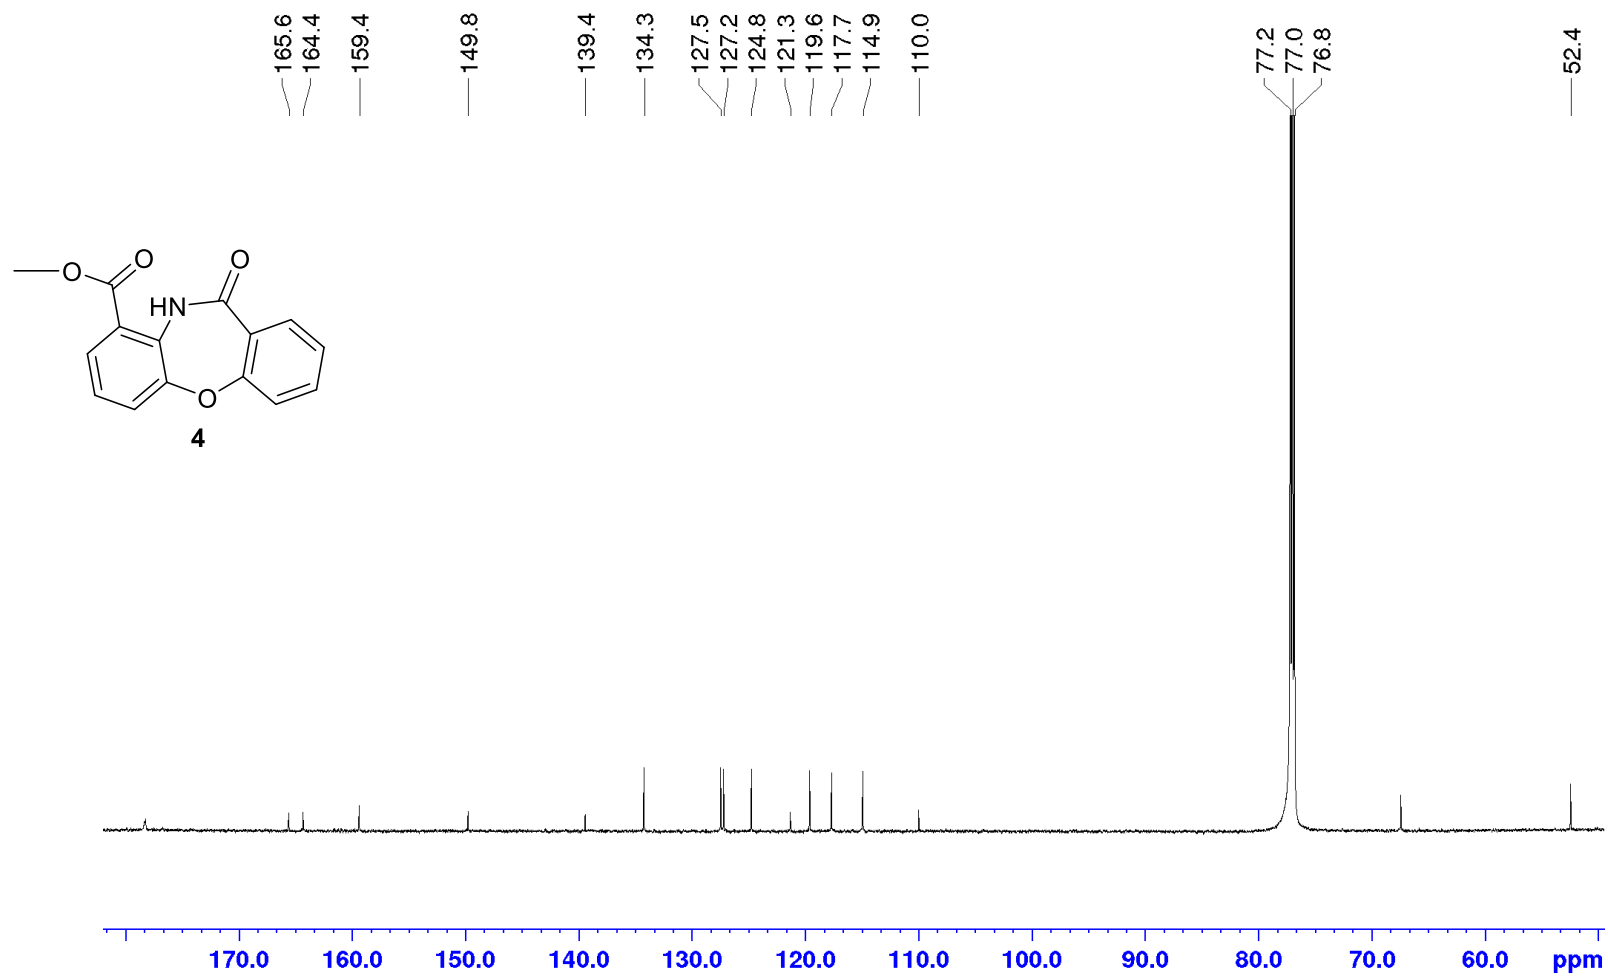

**Figure S7.** Spectral data for 9(*R*)-ganodermanol B (**5**).

**(A)** The  $^1\text{H}$  NMR spectrum of 9(*R*)-ganodermanol B (**5**) in  $\text{CDCl}_3$ .

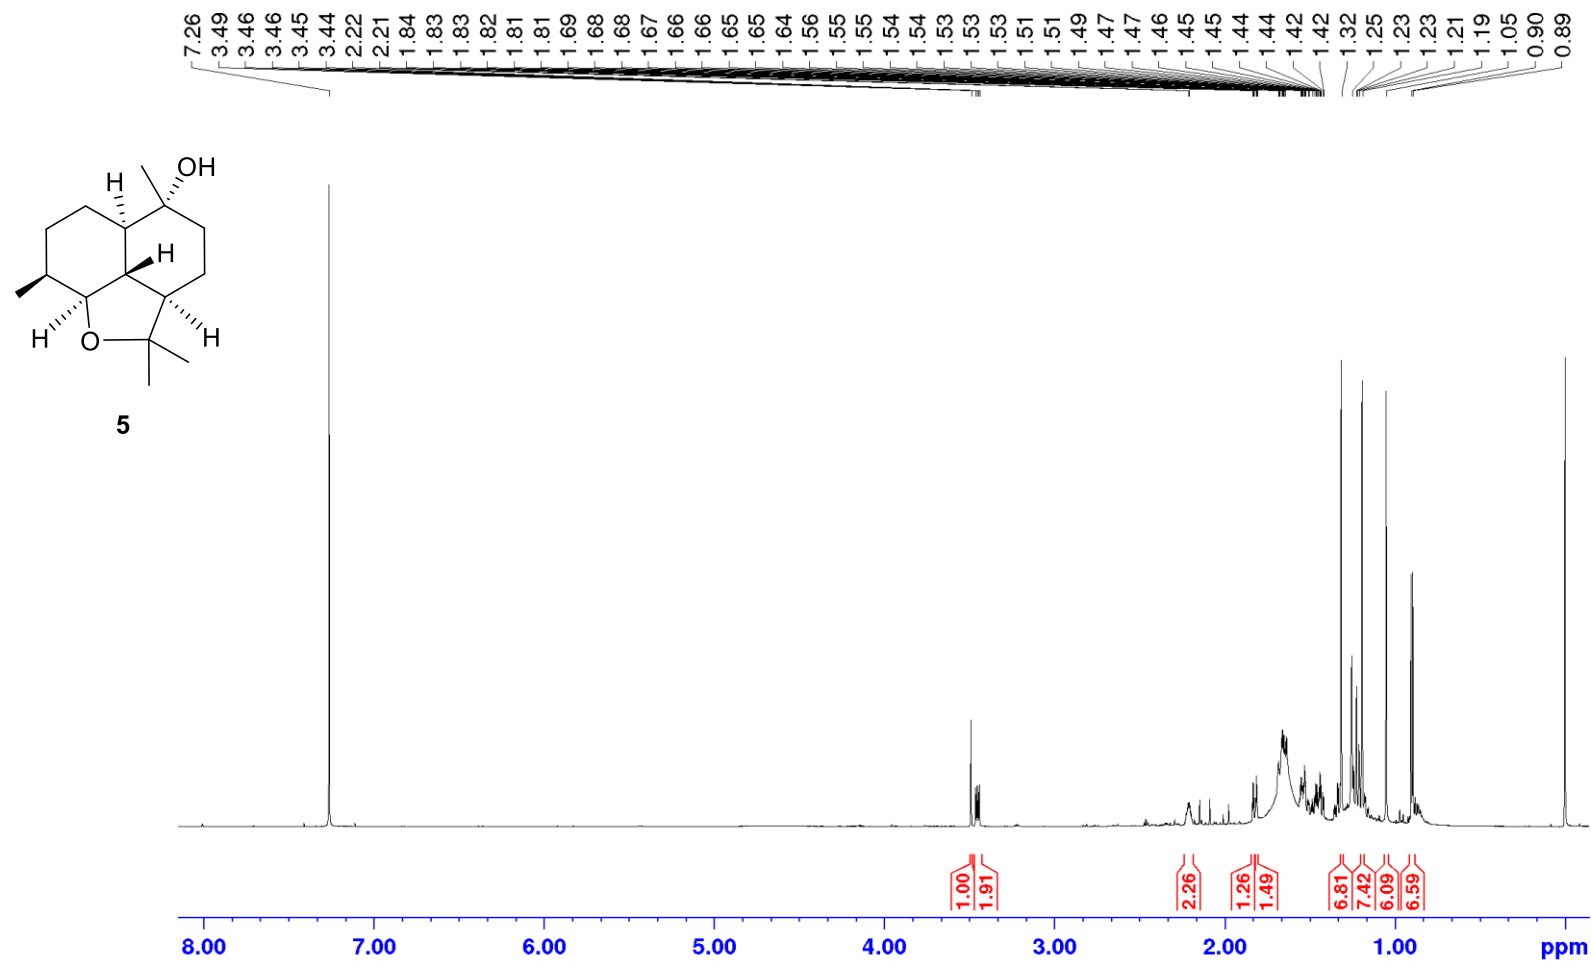

**(B)** The  $^{13}\text{C}$  NMR spectrum of 9(*R*)-ganodermanol B (**5**) in  $\text{CDCl}_3$ .

8. 7. 3.

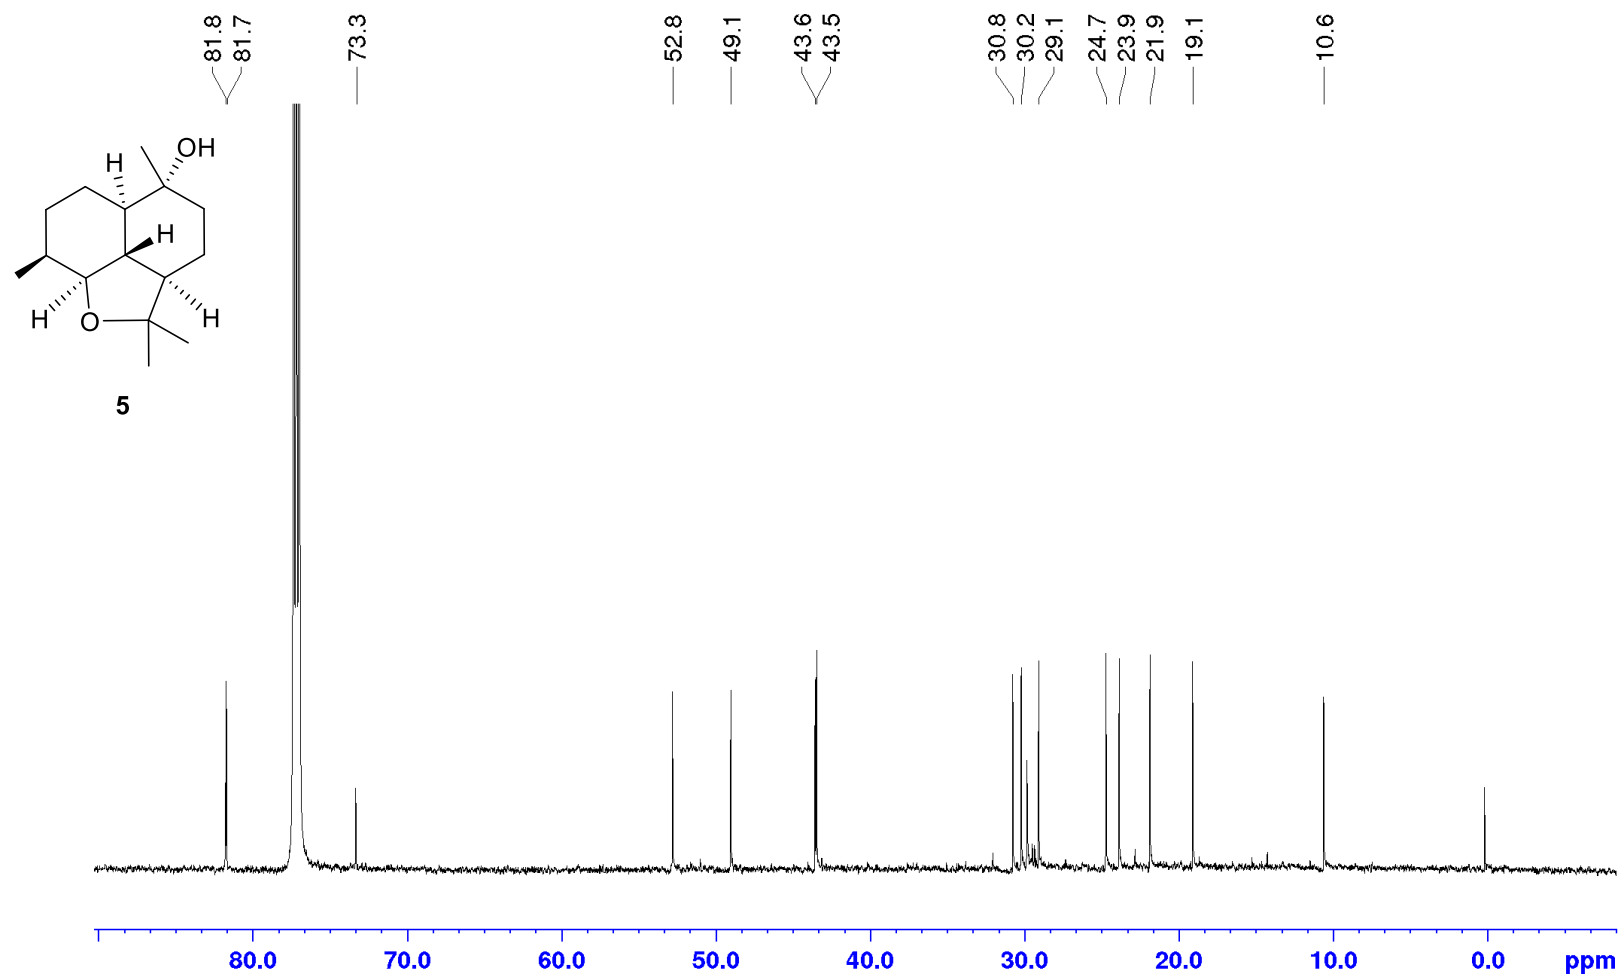

**Figure S8.** Spectral data for isopterocarpolone (**6**).

**(A)** The  $^1\text{H}$  NMR spectrum of isopterocarpolone (**6**) in  $\text{DMSO}-d_6$ .

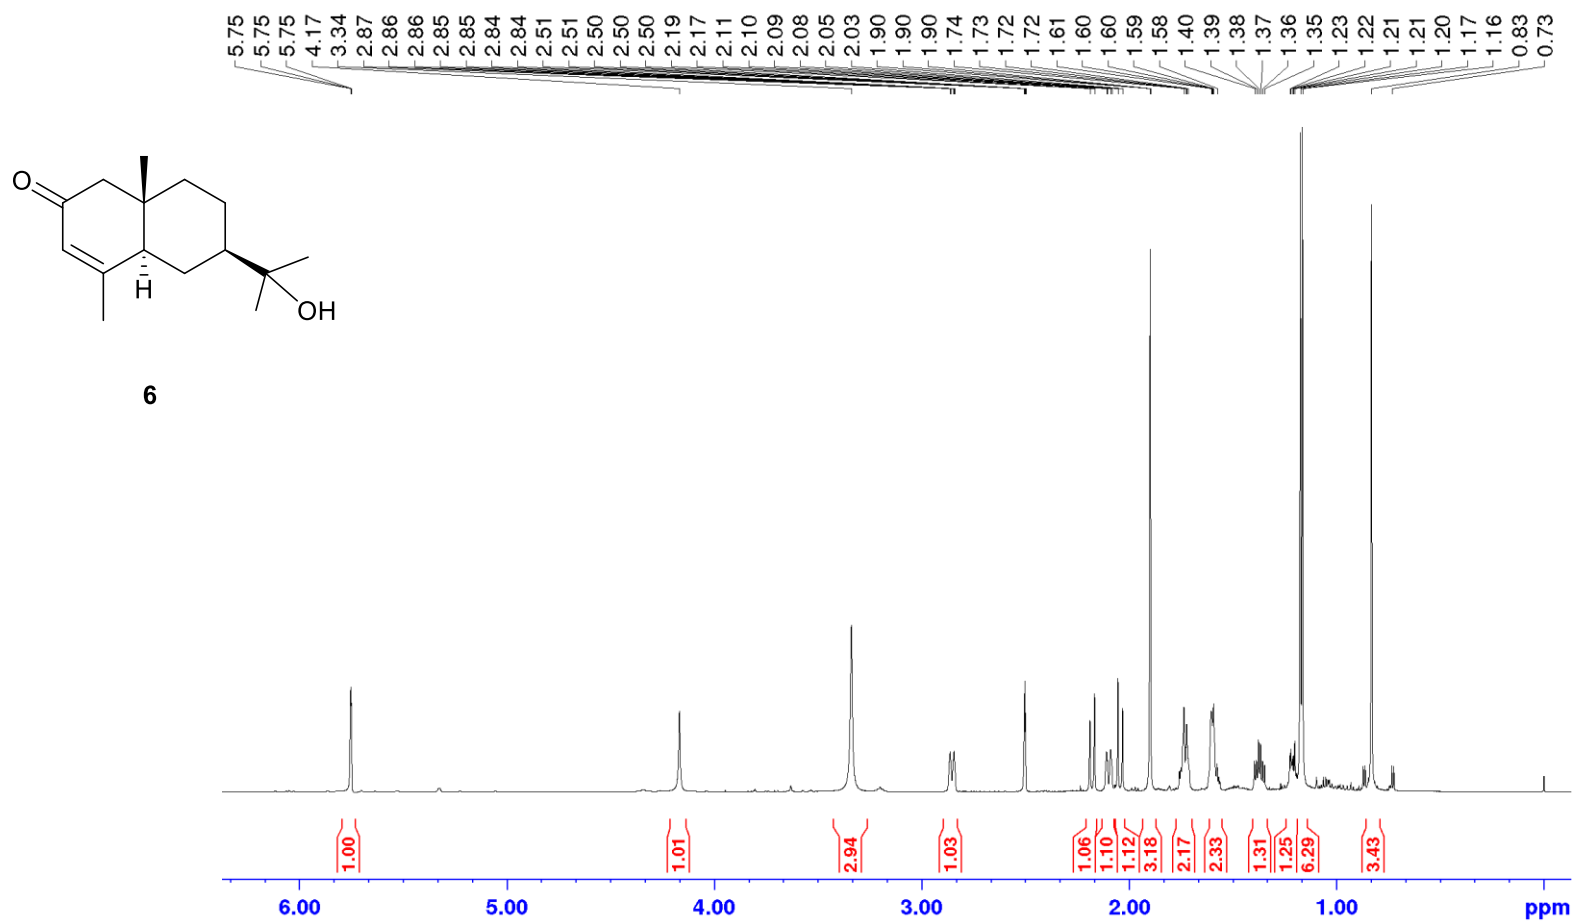



**Figure S8.** Spectral data for isopterocarpolone (**6**) (continued).

**(B)** The  $^{13}\text{C}$  NMR spectrum of isopterocarpolone (**6**) in  $\text{DMSO}-d_6$ .

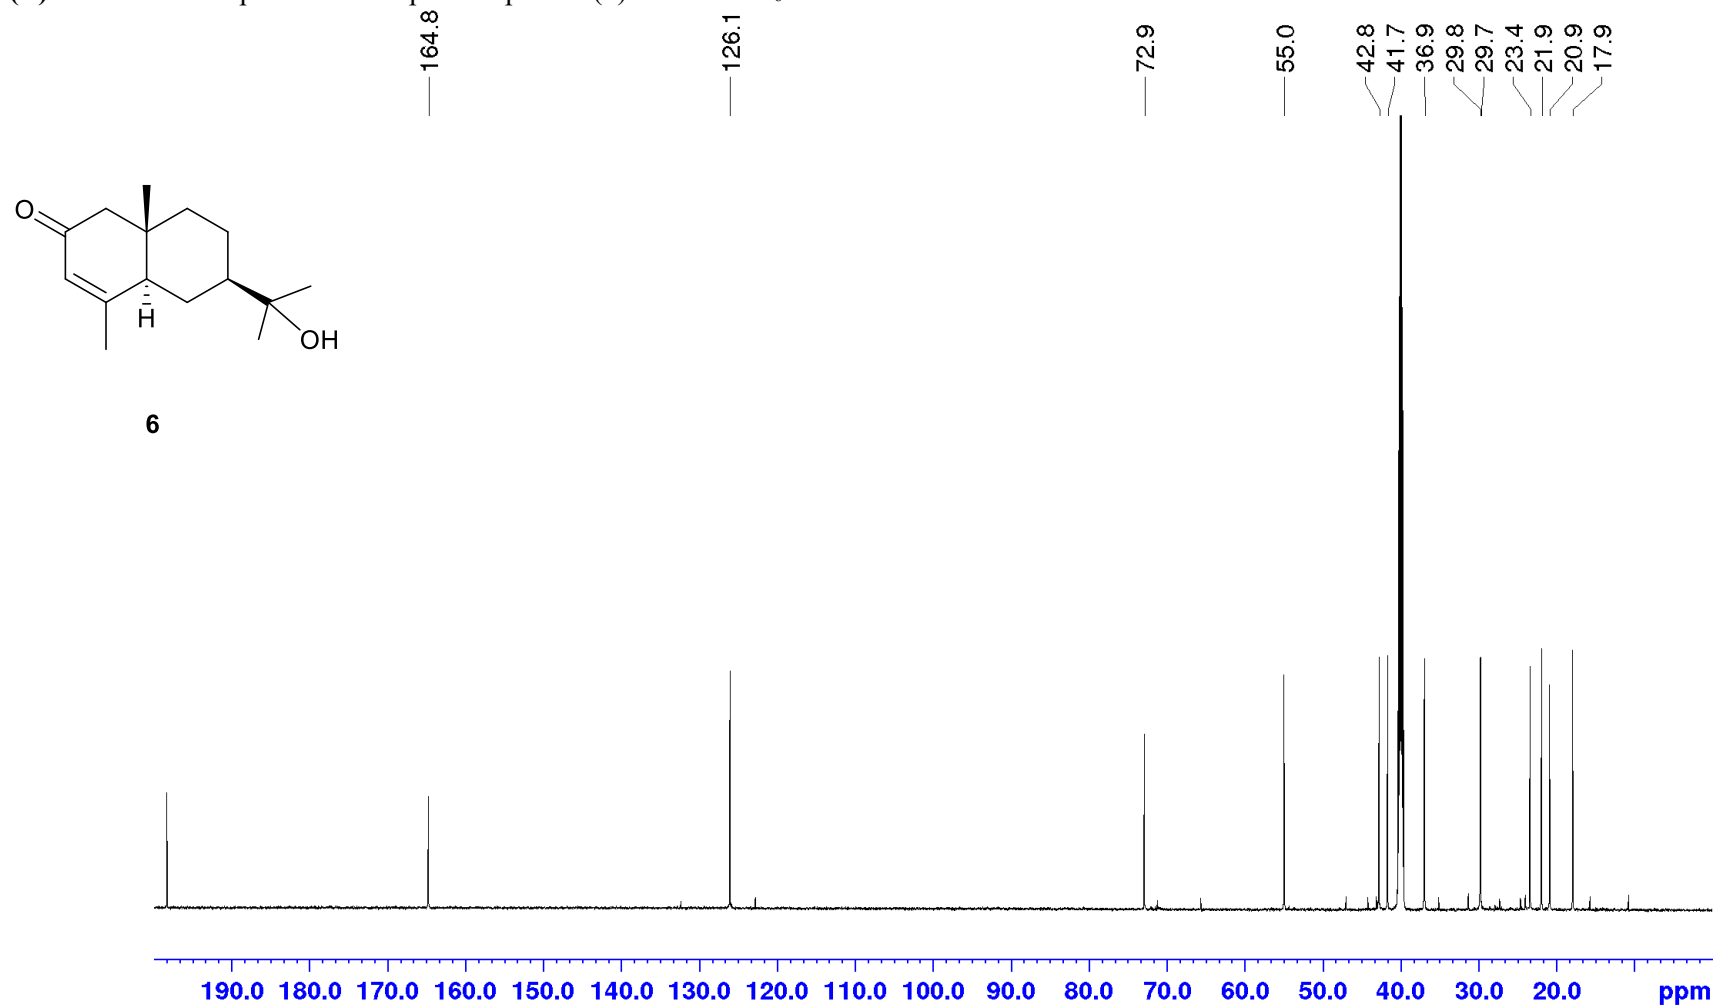

Supplement: s1 [file s1]
